# Supplementary material
Source: PubMed Central journal article supplement (PMC9026237)
Supplement: jamaoncol-e220373-s001.pdf [file jamaoncol-e220373-s001.pdf]

## Supplemental Online Content

Zeng C, Bastarache LA, Tao R, et al. Association of pathogenic variants in hereditary cancer genes with multiple diseases. *JAMA Oncol*. Published online April 21, 2022. doi:10.1001/jamaoncol.2022.0373

**eMethods.** Study Populations and Analyses

**eFigure 1.** Number of Phenotypes Evaluated for Each Gene in the eMERGEseq, HCR, and UKB Data Sets

**eFigure 2.** Permutation Test to Estimate the Empirical Phenome-Wide Significant  $P$  Value Threshold to Control Type I Errors

**eTable 1.** Full List of Genes Sequenced in the eMERGE Network

**eTable 2.** Population Characteristics of the eMERGEseq, HCR, and UKB Cohorts

**eTable 3.** Number and Percentage of Carriers by Each Gene in Each Ancestral Group Across 3 Cohorts

**eTable 4.** Association Results of Known Gene-Phenotype Associations Documented in the OMIM Database

**eTable 5.** Sensitivity Analyses With Analyses Restricted to European Descendants for All Newly Identified Associations

**eTable 6.** Sensitivity Analyses That Removed Participants With Prior Cancer Diagnoses in New Associations With Noncancer Phenotypes in the UKB Cohort

**eTable 7.** Sensitivity Analyses for *CHEK2* in the UKB Cohort

**eTable 8.** Associations of Pathogenic/Likely Pathogenic Variants in *CHEK2* With Subtypes of Leukemia

**eTable 9.** Associations of *BRCA1* and *BRCA2* With Phenotypes With Phenome-Wide Significance in PheWAS

**eReferences**

This supplementary material has been provided by the authors to give readers additional information about their work.

## **eMethods. Study Populations and Analyses**

### **Study populations**

The eMERGEseq cohort is comprised of 24,956 biobank or prospectively recruited individuals from ten clinical sites under the eMERGE network between 2016 and 2018.<sup>1</sup> All sites consented participants under Institutional Review Board (IRB)-approved protocols and the two sequencing centers had IRB-approved protocols that deferred consent to the sites (Partners Healthcare (2015P000929), Baylor College of Medicine (#H-40455)).<sup>1</sup> These ten sites are Cincinnati's Children's Hospital and Medical Center (CCHMC), Children's Hospital of Philadelphia (CHOP), Columbia University (CU), Geisinger (GE), Kaiser Permanente of Washington (KPWA, formerly Group Health Cooperative)/University of Washington (UW), Mayo Clinic (MC), Northwestern University (NU), Partners HealthCare (PHC), and Vanderbilt University Medical Center (VUMC). Specifically, CHOP and CCHMC sites recruited pediatric patients. Approximately 2,500-3,000 participants were recruited from each site. The following sites recruited participants without specific populations or phenotypes of interest: VUMC, PHC and CCHMC. The following sites enriched participants of specific indications, which include patients with diagnoses and/or family history. CHOP: autistic behaviors; CU: renal disease, liver disease and cancer; GE: participants from MyCode community health initiative;<sup>2</sup> KPWA/UW: colorectal polyps/cancer; MC: hypercholesterolemia, colon polyps and dyslipidemia; NU: lipid disorders, atrial fibrillation, breast cancer, ovarian cancer screening, and dermatologic disorders. For cancer-related phenotypes, a total of 211 participants with the indication for breast cancer, 186 for ovarian cancer and 2,437 for colorectal polyps/cancer were included in this cohort. Other common indications included autistic behaviors (n=722), chronic kidney diseases (n=996), hyperlipidemia (n=1,415) and intellectual disability (n=1,468).

The second dataset was obtained from the hereditary cancer registry (HCR) at Vanderbilt University Medical Center (VUMC). This study was approved by the IRB at VUMC. This cohort included 3,794 individuals who received clinical genetic testing for hereditary cancer<sup>3</sup> between 2012 and 2020. Testing results were returned to clinicians and patients and documented in the EHRs and recoded in the registry. Detailed information on personal and family history of cancer were also documented in the registry. This cohort was enriched for individuals at a high risk of hereditary cancer syndromes, with 98% reporting a family history of cancers and 65% reporting a personal history of cancer. Specifically, approximately 50% of all patients reported a breast cancer diagnosis. This cohort also included pediatric cancer patients. The ages at the first cancer diagnoses ranged from 1 year old to 90 years old, with a mean age at diagnosis of 50.4 years old, as documented in the EHRs.

The UK Biobank (UKB) is a prospective population-based cohort study of 500,217 participants aged 40-69 years at recruitment with 54% being female and 94% being of European ancestry, who were recruited between 2006-2010 and are continuously followed.<sup>4</sup> The UK Biobank has been approved by the NHS and National Research Ethics Service North West (11/NW/0382; 16/NW/0274), the National Information Governance Board for Health and Social Care in England and Wales, and the Community Health Index Advisory Group in Scotland. In addition, an independent Ethics and Governance Council oversees its continuous adherence to the Ethics and Governance Framework. Additional details on this framework have been described elsewhere.<sup>5</sup> More details can be found the UK biobank website. The current study was conducted under the UK Biobank application 68025.

### **Assessment of missing data and loss to follow-up**

For the eMERGE and HCR cohorts, all available ICD data in EHRs were used for the included population and no missing data were found for their baseline characteristics. For the UKB biobank, we found no missing data in the baseline characteristics, and those with poor genotyping quality were removed. The loss to follow-up in UKB (0.2%) was rare. No evidence of associations is found between carrier status in this study and the loss to follow-up. This non-differential loss to follow-up is likely to lead bias towards to the null if any.

### **Reporting race/ethnicity**

To account for potential confounding by population stratifications, we adjusted for race in our analyses, in addition to other covariates. In the eMERGE cohort, we used the genetically defined ancestry according to the first 4 principal components. We've previously determined that the first 4 principal components (PCs) were sufficient for accounting for population stratifications in this cohort.<sup>6</sup> In the HCR cohort, we used the self-reported race documented in the EHRs. In the UKB cohort, we used the first 16 PCs. Additional information on how UKB collected race data have been described previously.<sup>4</sup>

### **Gene panel and sequencing in eMERGEseq, genetic testing in HCR and whole exome sequencing in UKB**

Details on the design of the sequencing panel of the eMERGEseq project have been previously described<sup>6</sup>. Briefly, this panel comprises a total of 109 genes and 1550 single nucleotide variants (SNVs). The 109 genes include 58 genes from the American College of Medical Genetics and Genomics (ACMG) actionable finding list.<sup>7</sup> Additionally, each of the participating sites nominated up to 6 genes relevant to site-specific research interest. In this study, we focused on hereditary cancer genes on this panel, including 25 genes related to cancer phenotypes determined by the ACMG working groups<sup>7, 8</sup>. These genes included *APC*, *BMPRIA*, *BRCA1*, *BRCA2*, *MEN1*, *MLH1*, *MSH2*, *MSH6*, *MUTYH*, *NF2*, *PMS2*, *PTEN*, *RB1*, *RET*, *SDHAF2*, *SDHB*, *SDHC*, *SDHD*, *SMAD4*, *STK11*, *TP53*, *TSC1*, *TSC2*, *VHL*, and *WT1*, and 6 genes related to cancer phenotypes determined by experts in the eMERGE network and nominated by participating sites. These genes were *ATM*, *BLM*, *CHEK2*, *PALB2*, *POLD1*, and *POLE*. Note that *PALB2* has been included in the most recent ACMG actionable gene list published in 2021.<sup>8</sup>

The genetic testing in the HCR was performed by commercial Clinical Laboratory Improvement Amendments (CLIA) and College of American Pathologists (CAP)-accredited molecular diagnostic laboratories as part of clinical service.

Whole-exome sequencing data for UKB participants were generated at the Regeneron Genetics Center. Exomes were captured by paired-end 75-bp whole-exome sequencing using the IDT xGen v1 capture kit on the NovaSeq6000 platform. Details on the sequencing, data process and quality controls were described elsewhere.<sup>9</sup>

### **Classification of variants**

Variant classifications in the eMERGEseq were performed by two CLIA/CAP-accredited laboratories at the sequencing centers of the eMERGE network, according to ACMG/Association of Medical Pathology (ACMG/AMP) guidelines and some specific modifications from ClinGen Sequence Variant Interpretation Working Group and ClinGen Expert Panels as previously described.<sup>6</sup> We only included variants with an allele fraction > 30%. Variants were classified into pathogenic (P), likely pathogenic (LP), variant of uncertain significance (VUS), likely benign (LB) and benign (B). No P/LP variants for cancer syndromes were detected for *BLM*, *BMPRIA*, *NF2*, *POLD1*, *POLE*, *SDHAF2*, *SMAD4*, and *STK11*.<sup>6</sup>

Variant classification in UKB was performed according to the ACMG/AMP guidelines. For shared variants with the eMERGEseq cohort, we make classification results from both cohorts identical according to the guidelines mentioned above.

Variant classification in the HCR was performed by commercial CLIA/CAP-accredited molecular diagnostic laboratories. Results were returned to clinicians and patients and were documented in the EHRs. We compared results of classification for the same variants identified in the eMERGEseq and HCR cohorts (n=11). The variant *VHL* p.R200W was classified as a VUS in the eMERGEseq/UKB dataset, while it was classified as a pathogenic variant (P) in the HCR dataset. Previous studies showed that this variant was not associated with the von Hippel Lindau (VHL) disease but congenital erythrocytosis.<sup>10</sup> Therefore, we considered this variant a VUS in the analysis in the HCR dataset. The interpretations for the remaining 10 variants were consistent between these two datasets.

For each gene, we defined patients with P/LP variants as carriers and patients with B/LB variants or no rare variants as non-carriers, and patients with VUS as VUS carriers. For *MUTYH*, we only considered biallelic mutation

carriers. The frequency of carriers identified in each cohort was consistent with previous studies under similar settings.<sup>11-19</sup>

To test the feasibility of testing the difference in the prevalence of carrier for each gene across ancestral groups, we performed power calculations through simulations. We found that this study is underpowered to detect the differences in the prevalence of carriers among ancestral groups (beta <30% for genes studied) assuming a  $\chi^2$  distribution. For distribution assumption-free tests, the currently available approaches, relying on Monte Carlo methods, such as Fisher-Freeman-Halton test, have not been equipped to perform in such a large sample size as in UKB. Caution should be exercised in interpreting results presented in eTable 3.

### **Phecodes for phenotyping using EHR-based data**

PheWAS phenotypes were defined using phecodes, which are manually grouped ICD-9 and ICD-10 codes developed to facilitate EHR based genetic research. In this study, we modified and expanded our previous pcode map<sup>20, 21</sup> by adding more granular phenotypes, including those related to Mendelian disorders and other traits in the congenital, neonatal, developmental, ocular, and pregnancy categories. Using the EHR data from a cohort of 2.6 million patients from the Synthetic Derivative (SD) at VUMC<sup>22</sup>, this new algorithm derived 3,368 phecodes from 16,245 unique ICD-9 codes and 18,893 unique ICD-10 codes, spanning the following categories: auditory, cardiovascular, congenital, dermatologic, developmental, digestive, endocrine, genitourinary, hematopoietic, infectious, musculoskeletal, neonate, neoplastic, ocular, pregnant, psychiatric, pulmonary, and symptoms/signs.

We derived 3186 unique PheWAS phenotypes from 2,134,933 unique dates of ICD-9 and -10 codes in the EHRs of the eMERGEseq cohort. We removed phenotypes with < 5 cases. A total of 3,017 phenotypes remained. To empirically estimate the phenome-wide significant *P*-value threshold, we conducted 10,000 PheWAS with a random variable using data from the eMERGEseq cohort and analyzed the distributions of minimum *P*-values (*P*<sub>min</sub>) for each PheWAS. The 95<sup>th</sup> percentile of *P*<sub>min</sub> was  $2.5 \times 10^{-5}$ , and we defined this *P*-value as the empirical phenome-wide significance threshold at a significance level of  $\alpha = 0.05$  (eFigure 2), which was equivalent to the Bonferroni correction of 2000 independent tests.

### **Definition of known gene-phenotype associations**

We retrieved the clinical synopses for each gene from the Online Mendelian Inheritance in Man (OMIM), a comprehensive, authoritative compendium of human genes and genetic phenotypes.<sup>23</sup> We retrieved data of gene-diseases validity from ClinGen.<sup>24</sup> We defined gene-cancer associations with definitive evidence of clinical validity by ClinGen working groups as primary gene-cancer associations.<sup>25</sup> We did not include WT1 with Wilms tumors as none of the WT1 carriers were from our pediatric cohorts.

As previously reported<sup>21</sup>, to test the probability of replicating *X* out of *Y* known associations at  $\alpha = 0.05$ , we calculated based on the probability of drawing *P*-values randomly from a normal distribution with at least *X* of them having a  $P < 0.05$  (*X* being the number of replicated associations). Thus, the probability of getting *X* gene-phenotype associations replicated ( $P < 0.05$ ) out of *Y* tested associations is:  $P(X) = C(Y, X)P^X(1 - P)^{Y-X}$ , where  $P = 0.05$  and  $C(Y, X)$  represents the number of combinations selecting *X* items from among set of *Y* items.

### **PheWAS analyses**

In each cohort, we used a minimum code count threshold of one pcode to define cases for a phenotype. We defined controls as those who never had the pcode. We included genes with at least 2 carriers. We focused on phenotypes that were documented in the carriers. The number of phenotypes found in carriers for each gene is shown in eFigure 1.

In the UKB dataset, phenotypes were derived from in-patient medical records, tumor/death registry and self-reported outcomes. Therefore, health outcomes related to out-patient settings were less likely to be collected than those in eMERGEseq and HCR cohorts which collected data unbiasedly from EHRs. For the outcome “Vitamin D deficiency”, we used data of serum 25(OH)D concentrations measured from blood samples collected from

participants at baseline instead of ICD codes. Serum 25(OH)D concentration was categorized as <25.0, 25.0–49.9, and ≥50 nmol/L. To be consistent with the definition of Vitamin D deficiency in clinical settings and previous studies using the data,<sup>26</sup> we defined participants with <25.0nmol/L as “Vitamin D deficiency” cases, participants with ≥50 nmol/L as controls and removed those within 25.0–49.9 nmol/L from the analysis. Details of vitamin D measurements in UKB were described elsewhere.<sup>26</sup>

We conducted chart reviews to confirm the diagnoses of the PheWAS phenotypes and to study the relationships between new and known phenotypes. Specifically, for the PheWAS phenotype ovarian cysts, we reviewed all cases among *BRCA1/2* carriers in the HCR cohort (20 and 24 cases among carriers of *BRCA1* and *BRCA2*, respectively). We also reviewed a random subset of 54 cases among non-carriers of *BRCA1/2*. We tested the hypothesis that there was no difference in terms of the PheWAS phenotype capturing the actual diagnoses for ovarian cyst between carriers and non-carriers. Under this null hypothesis,  $P=1$  for both genes.

Although we replicated all established gene-cancer associations defined by the ClinGen working groups,<sup>24</sup> <sup>27</sup> we reviewed all known phenotypes that were not replicated. Most of them were phenotypes that are not specifically collected in the current hospital systems in the US and/or phenotypes that UKB did not specifically collect data on. These phenotypes included diseases of teeth and supporting structures, malaise and fatigue, headache, mottled skin, disorders of skin pigmentation, seborrheic keratosis, constipation, dysphagia, tachycardia, myopia, cataract, and basal cell carcinoma. Data of these phenotypes were likely to be underdocumented in EHRs because of their relatively benign nature, lack of inclusion of dental records and their designated clinics. Most of these phenotypes were not specifically collected in the UKB cohort (eTable 4). After removing these phenotypes, only 20 known gene-phenotypes were not replicated, all of which was of a low or moderate penetrance according to literature.<sup>28, 29</sup> The probability of replicating these associations is expected to be lower compared to others with high penetrance. We also performed the same sensitivity analyses in European descendants only for these 20 known associations. No substantial differences were found, and these associations remained statistically insignificant.

**eFigure 1. Number of Phenotypes Evaluated for Each Gene in the eMERGEseq, HCR, and UKB Data Sets**

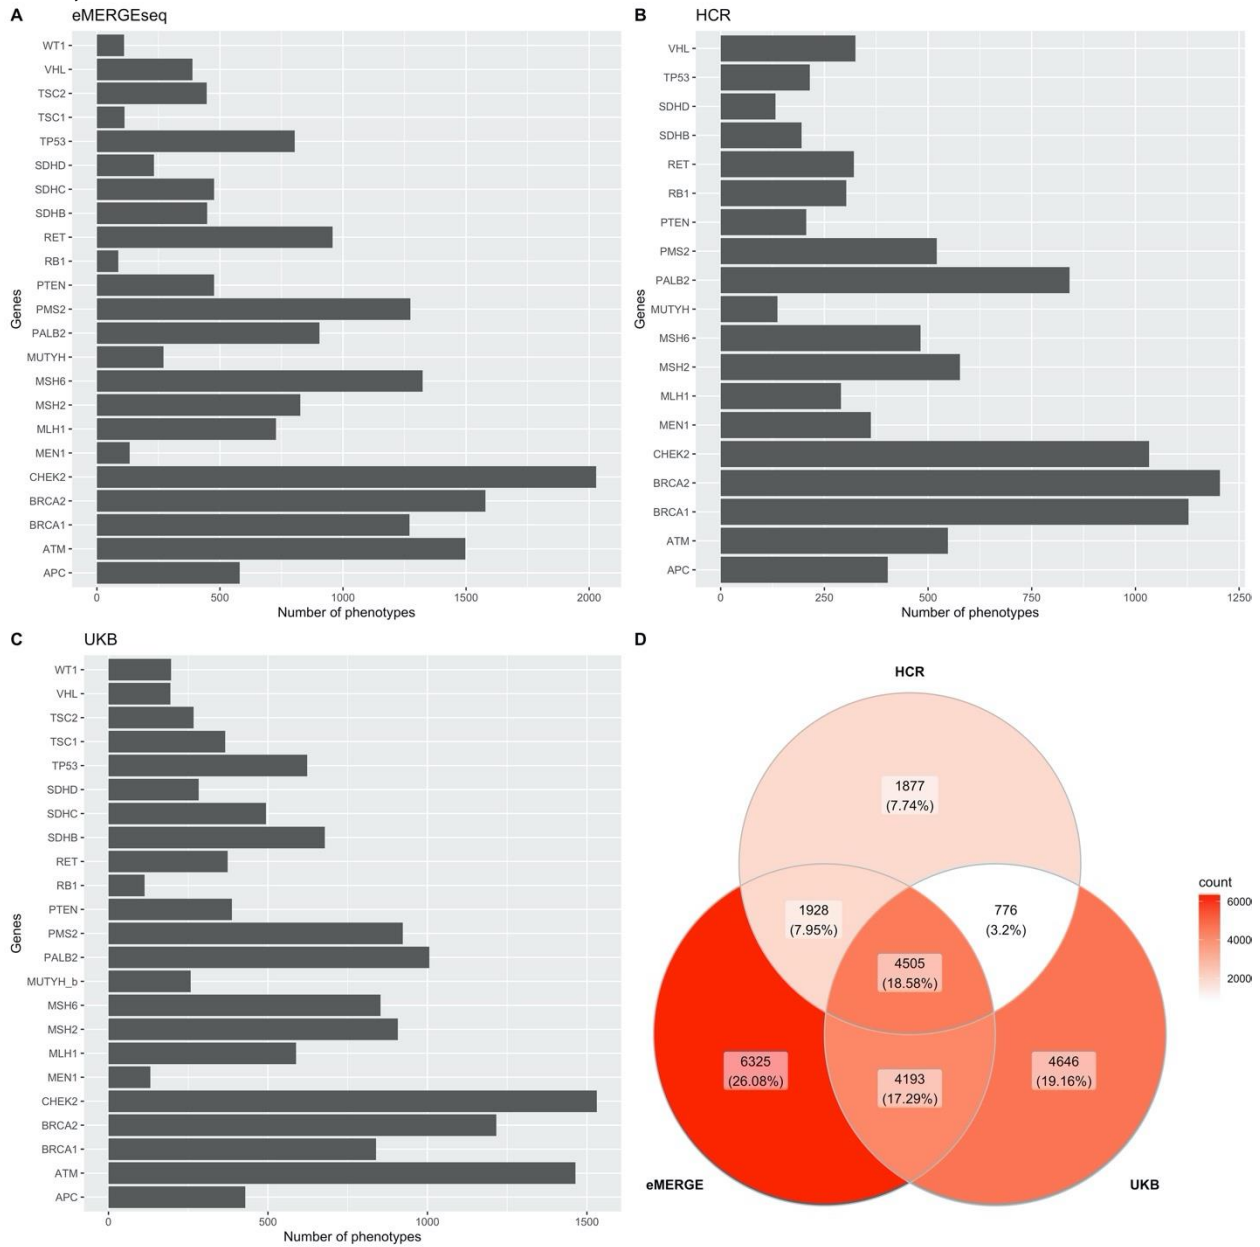

**eFigure 2. Permutation Test to Estimate the Empirical Phenome-Wide Significant P Value Threshold to Control Type I Errors**

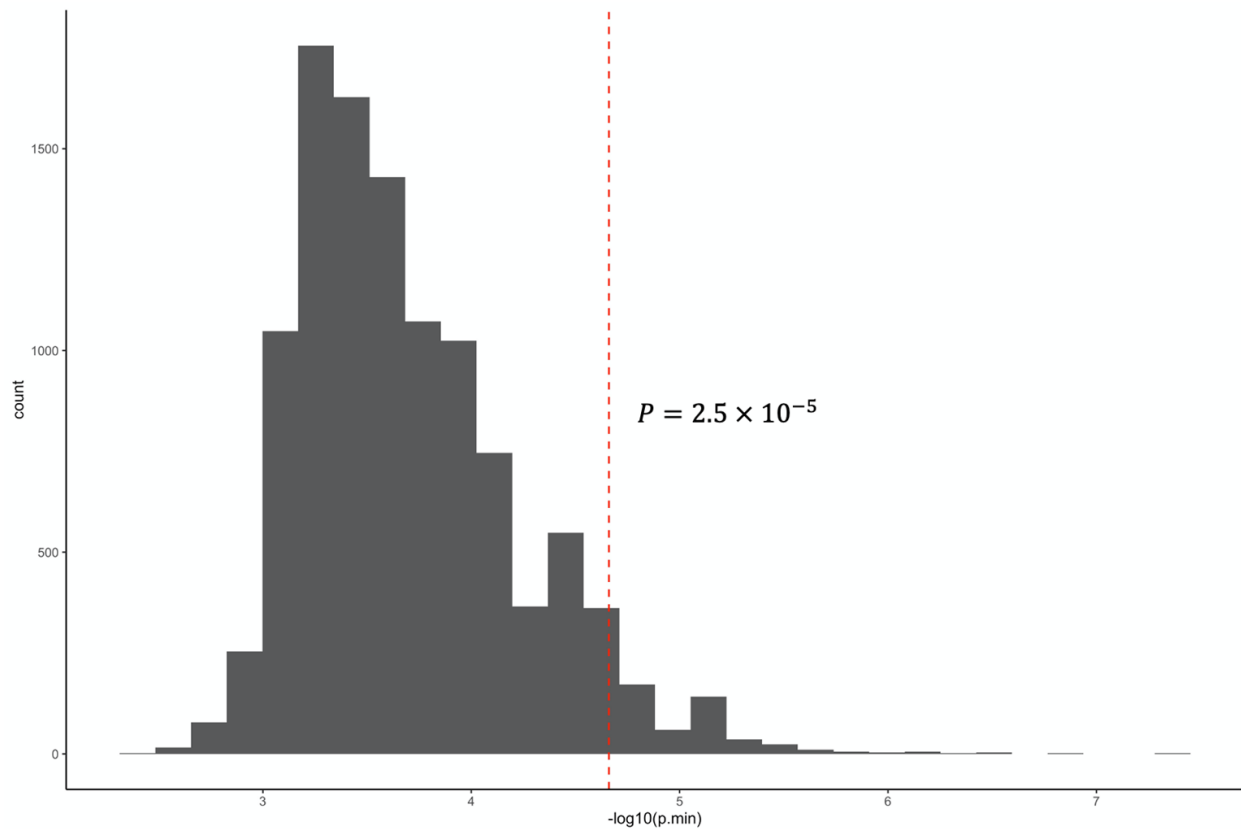

We conducted 10,000 PheWASs of a random variable using firth logistic regression in the eMERGEseq data and analyzed the distributions of minimum P values (Pmin) for each PheWAS. The 95th percentile of Pmin was  $2.5 \times 10^{-5}$ , and we defined this P value as the empirical phenome-wide significance threshold at a significance level of  $\alpha = 0.05$ .

**eTable 1. Full List of Genes Sequenced in the eMERGE Network**

| <b>Gene</b>    | <b>Original List</b> |
|----------------|----------------------|
| <i>ACTA2</i>   | ACMG                 |
| <i>ACTC1</i>   | ACMG                 |
| <i>APC</i>     | ACMG                 |
| <i>APOB</i>    | ACMG                 |
| <i>BRCA1</i>   | ACMG                 |
| <i>BRCA2</i>   | ACMG                 |
| <i>BMPR1A</i>  | ACMG                 |
| <i>CACNA1S</i> | ACMG                 |
| <i>COL3A1</i>  | ACMG                 |
| <i>DSC2</i>    | ACMG                 |
| <i>DSG2</i>    | ACMG                 |
| <i>DSP</i>     | ACMG                 |
| <i>FBN1</i>    | ACMG                 |
| <i>GLA</i>     | ACMG                 |
| <i>KCNH2</i>   | ACMG                 |
| <i>KCNQ1</i>   | ACMG                 |
| <i>LDLR</i>    | ACMG                 |
| <i>LMNA</i>    | ACMG                 |
| <i>MEN1</i>    | ACMG                 |
| <i>MLH1</i>    | ACMG                 |
| <i>MSH2</i>    | ACMG                 |
| <i>MSH6</i>    | ACMG                 |
| <i>MUTYH</i>   | ACMG                 |
| <i>MYBPC3</i>  | ACMG                 |
| <i>MYH11</i>   | ACMG                 |
| <i>MYH7</i>    | ACMG                 |
| <i>MYL2</i>    | ACMG                 |
| <i>MYL3</i>    | ACMG                 |
| <i>MYLK</i>    | ACMG                 |
| <i>NF2</i>     | ACMG                 |
| <i>PCSK9</i>   | ACMG                 |
| <i>PKP2</i>    | ACMG                 |
| <i>PMS2</i>    | ACMG                 |
| <i>PRKAG2</i>  | ACMG                 |



| <b>Gene</b>    | <b>Original List</b> |
|----------------|----------------------|
| <i>PTEN</i>    | ACMG                 |
| <i>RB1</i>     | ACMG                 |
| <i>RET</i>     | ACMG                 |
| <i>RYR1</i>    | ACMG                 |
| <i>RYR2</i>    | ACMG                 |
| <i>SCN5A</i>   | ACMG                 |
| <i>SDHAF2</i>  | ACMG                 |
| <i>SDHB</i>    | ACMG                 |
| <i>SDHC</i>    | ACMG                 |
| <i>SDHD</i>    | ACMG                 |
| <i>SMAD3</i>   | ACMG                 |
| <i>SMAD4</i>   | ACMG                 |
| <i>STK11</i>   | ACMG                 |
| <i>TGFBR1</i>  | ACMG                 |
| <i>TGFBR2</i>  | ACMG                 |
| <i>TMEM43</i>  | ACMG                 |
| <i>TNNI3</i>   | ACMG                 |
| <i>TNNT2</i>   | ACMG                 |
| <i>TP53</i>    | ACMG                 |
| <i>TPM1</i>    | ACMG                 |
| <i>TSC1</i>    | ACMG                 |
| <i>TSC2</i>    | ACMG                 |
| <i>VHL</i>     | ACMG                 |
| <i>WT1</i>     | ACMG                 |
| <i>ANGPTL3</i> | SITE NOMINATED       |
| <i>ANGPTL4</i> | SITE NOMINATED       |
| <i>ANK2</i>    | SITE NOMINATED       |
| <i>APOA5</i>   | SITE NOMINATED       |
| <i>APOC3</i>   | SITE NOMINATED       |
| <i>APOE</i>    | SITE NOMINATED       |
| <i>ATM</i>     | SITE NOMINATED       |
| <i>ATP1A2</i>  | SITE NOMINATED       |
| <i>BMPR2</i>   | SITE NOMINATED       |
| <i>CACNA1A</i> | SITE NOMINATED       |
| <i>CACNA1B</i> | SITE NOMINATED       |
| <i>CACNA1C</i> | SITE NOMINATED       |
| <i>CFH</i>     | SITE NOMINATED       |
| <i>CFTR</i>    | SITE NOMINATED       |

| <b>Gene</b>     | <b>Original List</b> |
|-----------------|----------------------|
| <i>CHEK2</i>    | SITE NOMINATED       |
| <i>COL5A1</i>   | SITE NOMINATED       |
| <i>CORIN</i>    | SITE NOMINATED       |
| <i>FLG</i>      | SITE NOMINATED       |
| <i>GRM1</i>     | SITE NOMINATED       |
| <i>GRM2</i>     | SITE NOMINATED       |
| <i>GRM5</i>     | SITE NOMINATED       |
| <i>GRM7</i>     | SITE NOMINATED       |
| <i>GRM8</i>     | SITE NOMINATED       |
| <i>HNF1A</i>    | SITE NOMINATED       |
| <i>HNF1B</i>    | SITE NOMINATED       |
| <i>IL33</i>     | SITE NOMINATED       |
| <i>IL4</i>      | SITE NOMINATED       |
| <i>KCNE1</i>    | SITE NOMINATED       |
| <i>KCNJ2</i>    | SITE NOMINATED       |
| <i>MC4R</i>     | SITE NOMINATED       |
| <i>MTHFR</i>    | SITE NOMINATED       |
| <i>NTRK1</i>    | SITE NOMINATED       |
| <i>OTC</i>      | SITE NOMINATED       |
| <i>PALB2</i>    | SITE NOMINATED       |
| <i>PLTP</i>     | SITE NOMINATED       |
| <i>POLD1</i>    | SITE NOMINATED       |
| <i>POLE</i>     | SITE NOMINATED       |
| <i>PON1</i>     | SITE NOMINATED       |
| <i>SCN1A</i>    | SITE NOMINATED       |
| <i>SCN9A</i>    | SITE NOMINATED       |
| <i>SERPINA1</i> | SITE NOMINATED       |
| <i>SLC25A40</i> | SITE NOMINATED       |
| <i>SLC2A10</i>  | SITE NOMINATED       |
| <i>TCF4</i>     | SITE NOMINATED       |
| <i>TCIRG1</i>   | SITE NOMINATED       |
| <i>TNF</i>      | SITE NOMINATED       |
| <i>TSLP</i>     | SITE NOMINATED       |
| <i>TTR</i>      | SITE NOMINATED       |
| <i>TYK2</i>     | SITE NOMINATED       |
| <i>UMOD</i>     | SITE NOMINATED       |
| <i>VDR</i>      | SITE NOMINATED       |

**eTable 2. Population Characteristics of the eMERGEseq, HCR, and UKB Cohorts**

| Site                                   | eMERGEseq (N=23,544) |              |               |               |               |               |               |              |               | HCR<br>(N=3,242) | UBK<br>(N=187,234) |
|----------------------------------------|----------------------|--------------|---------------|---------------|---------------|---------------|---------------|--------------|---------------|------------------|--------------------|
|                                        | CCHMC                | CHOP         | Columbia      | Geisinger     | Harvard       | KPW/UW        | Mayo          | Northwestern | VUMC          |                  |                    |
| <b>N</b>                               | 2936                 | 2964         | 2314          | 2489          | 2472          | 2479          | 2439          | 2963         | 2431          | 3242             | 187,234            |
| <b>Ancestry*</b>                       |                      |              |               |               |               |               |               |              |               |                  |                    |
| African                                | 1100                 | 1217         | 440           | 79            | 170           | 58            | 10            | 399          | 159           | 250              | 1580               |
| Asian                                  | 31                   | 83           | 190           | 19            | 75            | 934           | 17            | 145          | 19            | 71               | 9713               |
| European                               | 1810                 | 1672         | 1676          | 2397          | 2233          | 1507          | 2417          | 2425         | 2262          | 2829             | 175941             |
| <b>Female (%)</b>                      | 1465<br>(50%)        | 923<br>(31%) | 1238<br>(54%) | 1688<br>(68%) | 1404<br>(57%) | 1517<br>(61%) | 1409<br>(58%) | 1828 (62%)   | 1139<br>(47%) | 2851<br>(88%)    | 104055<br>(55.6%)  |
| <b>Age ranges (years)</b>              | 0-80                 | 0-22         | 0-89          | 0-90          | 0-91          | 7-89          | 0-73          | 0-90         | 9-90          | 0-99             | 38-85              |
| <b>Mean age (years)**</b>              | 16.8                 | 13.9         | 52.8          | 47.8          | 57.7          | 61.6          | 62.6          | 60.5         | 66.7          | 52.5             | 56.7               |
| <b>Mean (SD) EHR follow-up (years)</b> | 7.3<br>(3.1)         | 9.9<br>(4.0) | 8.1(7.0)      | 13.1<br>(5.6) | 11.9<br>(7.4) | 18.1<br>(6.8) | 22.1<br>(6.1) | 13.0 (6.9)   | 11.7<br>(5.4) | 8.8 (6.5)        | 12.4<br>(1.0)      |

SD: standard deviation; EHR: electronic health records; CCHMC: Cincinnati Children’s Hospital Medical Center; CHOP: Children’s Hospital of Philadelphia; KPW/UW Kaiser Permanente Washington/University of Washington; VUMC: Vanderbilt University Medical Center. The age range for each patient was determined by the first date and the last date of ICD codes in the record. Only CCHMC, CHOP, and HCR included children. \* In the eMERGEseq cohort, the ancestry was determined by using common variants throughout the eMERGEseq panel that includes 214 ancestry informative markers, while the ancestry was self-reported in the HCR and UKB cohorts. \*\*Mean age at recruitment for the UKB cohort; Mean of the last age documented in the electronic medical records for eMERGE and HCR.

**eTable 3. Number and Percentage of Carriers by Each Gene in Each Ancestral Group Across 3 Cohorts**

| Genes         | eMERGE    |          |            | HCR      |          |           | UKB      |           |             |
|---------------|-----------|----------|------------|----------|----------|-----------|----------|-----------|-------------|
|               | African   | Asian    | European   | African  | Asian    | European  | African  | Asian     | European    |
|               | N (%)     | N (%)    | N (%)      | N (%)    | N (%)    | N (%)     | N (%)    | N (%)     | N (%)       |
| <b>APC</b>    | 5 (0.14)  | 1 (0.07) | 8 (0.04)   | 2 (0.8)  | 1 (1.41) | 18 (0.64) | 0 (0)    | 5 (0.051) | 23 (0.01)   |
| <b>ATM</b>    | 6 (0.17)  | 3 (0.20) | 73 (0.40)  | 0 (0)    | 0 (0)    | 29 (1.03) | 8 (0.51) | 69 (0.71) | 1112 (0.63) |
| <b>BRCA1</b>  | 4 (0.11)  | 5 (0.33) | 72 (0.39)  | 11 (4.4) | 1 (1.41) | 78 (2.75) | 0 (0)    | 11 (0.11) | 200 (0.11)  |
| <b>BRCA2</b>  | 19 (0.52) | 4 (0.26) | 113 (0.61) | 6 (2.4)  | 1 (1.41) | 82 (2.89) | 6 (0.38) | 29 (0.30) | 574 (0.33)  |
| <b>CHEK2</b>  | 5 (0.14)  | 5 (0.33) | 262 (1.42) | 0 (0)    | 2 (2.82) | 41 (1.45) | 1 (0.06) | 38 (0.39) | 1682 (0.96) |
| <b>MEN1</b>   | 0 (0)     | 0 (0)    | 2 (0.01)   | 0 (0)    | 0 (0)    | 10 (0.35) | 0 (0)    | 1 (0.01)  | 6 (0.003)   |
| <b>MLH1</b>   | 4 (0.11)  | 1 (0.07) | 8 (0.04)   | 2 (0.8)  | 0 (0)    | 12 (0.42) | 0 (0)    | 7 (0.07)  | 71 (0.04)   |
| <b>MSH2</b>   | 0 (0)     | 1 (0.07) | 14 (0.08)  | 1 (0.4)  | 0 (0)    | 20 (0.71) | 7 (0.44) | 52 (0.54) | 190 (0.11)  |
| <b>MSH6</b>   | 2 (0.06)  | 2 (0.13) | 46 (0.25)  | 1 (0.4)  | 2 (2.82) | 14 (0.49) | 1 (0.06) | 10 (0.10) | 191 (0.11)  |
| <b>MUTYH*</b> | 0 (0)     | 0 (0)    | 4 (0.02)   | 0 (0)    | 0 (0)    | 3 (0.11)  | 0 (0)    | 2 (0.02)  | 27 (0.02)   |
| <b>PALB2</b>  | 5 (0.14)  | 1 (0.07) | 22 (0.12)  | 2 (0.8)  | 0 (0)    | 26 (0.01) | 1 (0.06) | 14 (0.14) | 352 (0.20)  |
| <b>PMS2</b>   | 6 (0.17)  | 2 (0.13) | 46 (0.25)  | 0 (0)    | 1 (1.41) | 15 (0.53) | 0 (0)    | 10 (0.10) | 273 (0.16)  |
| <b>PTEN</b>   | 0 (0)     | 1 (0.07) | 12 (0.07)  | 0 (0)    | 0 (0)    | 3 (0.11)  | 1 (0.06) | 0 (0)     | 25 (0.01)   |
| <b>RB1</b>    | 2 (0.06)  | 0 (0)    | 0 (0)      | 3 (1.2)  | 0 (0)    | 3 (0.11)  | 0 (0)    | 0 (0)     | 8 (0.004)   |
| <b>RET</b>    | 4 (0.11)  | 0 (0)    | 30 (0.16)  | 1 (0.4)  | 0 (0)    | 9 (0.32)  | 0 (0)    | 3 (0.03)  | 32 (0.02)   |
| <b>SDHB</b>   | 1 (0.03)  | 1 (0.07) | 4 (0.02)   | 0 (0)    | 0 (0)    | 4 (0.14)  | 0 (0)    | 1 (0.01)  | 21 (0.07)   |
| <b>SDHC</b>   | 1 (0.03)  | 1 (0.07) | 4 (0.02)   | 0 (0)    | 0 (0)    | 0 (0)     | 0 (0)    | 5 (0.05)  | 62 (0.04)   |
| <b>SDHD</b>   | 0 (0)     | 2 (0.13) | 2 (0.01)   | 0 (0)    | 0 (0)    | 5 (0.18)  | 0 (0)    | 1 (0.01)  | 20 (0.01)   |
| <b>TP53</b>   | 0 (0)     | 1 (0.07) | 10 (0.05)  | 1 (0.4)  | 1 (1.41) | 2 (0.07)  | 1 (0.06) | 24 (0.25) | 73 (0.04)   |
| <b>TSC1</b>   | 3 (0.08)  | 0 (0)    | 2 (0.01)   | 0 (0)    | 0 (0)    | 0 (0)     | 0 (0)    | 0 (0)     | 33 (0.02)   |
| <b>TSC2</b>   | 9 (0.25)  | 0 (0)    | 3 (0.02)   | 0 (0)    | 0 (0)    | 0 (0)     | 0 (0)    | 5 (0.05)  | 15 (0.009)  |
| <b>VHL</b>    | 0 (0)     | 1 (0.07) | 4 (0.02)   | 1 (0.4)  | 1 (1.41) | 6 (0.21)  | 1 (0.06) | 0 (0)     | 15 (0.009)  |
| <b>WT1</b>    | 0 (0)     | 1 (0.07) | 2 (0.01)   | 0 (0)    | 0 (0)    | 0 (0)     | 0 (0)    | 6 (0.06)  | 5 (0.003)   |

\*Biallelic mutation carriers only. The number of participants in each ancestral group in each cohort is found in eTable 2.

**eTable 4. Association Results of Known Gene-Phenotype Associations Documented in the OMIM Database**

| Gene | Phenotype                                                | eMERGE               | HCR                  | UKB                    | META                 | P        | Phet | OMIM    |
|------|----------------------------------------------------------|----------------------|----------------------|------------------------|----------------------|----------|------|---------|
|      |                                                          | OR (95% CI)          | OR (95% CI)          | OR (95% CI)            | OR (95% CI)          |          |      |         |
| APC  | Benign neoplasm of stomach                               | 7.88 (1.42-43.73)    | 17.97 (6.62-48.79)   | 15.87 (5.38-46.88)     | 15.07 (7.67-29.59)   | 3.32E-14 | 0.71 | OMIM    |
| APC  | Benign neoplasm of the anus and anal canal               | 2.86 (0.62-13.24)    | 5.08 (1.58-16.36)    | 17.04 (2.74-105.9)     | 5.51 (2.41-12.61)    | 0.00029  | 0.34 | OMIM    |
| APC  | Benign neoplasm of the colon and rectum                  | 2.41 (0.84-6.94)     | 40.76 (13.76-120.78) | 11.37 (5.13-25.22)     | 10.37 (5.99-17.96)   | 7.19E-16 | 0    | Primary |
| APC  | Benign neoplasm of the liver and intrahepatic bile ducts | 61 (7.66-485.98)     | 26.47 (3.48-201.34)  | 144.8 (8.47-2475.59)   | 52.01 (14.29-189.29) | 1.57E-08 | 0.62 |         |
| APC  | Benign neoplasm of the small intestine                   | 82.86 (13.58-505.54) | 61.24 (15.95-235.17) | 224.16 (32.56-1543.36) | 90.58 (35.31-232.36) | 8.22E-20 | 0.55 | OMIM    |
| APC  | Dental caries                                            | 1.96 (0.31-12.37)    | 6.07 (1.13-32.63)    |                        | 3.63 (1.05-12.58)    | 0.0419   | 0.37 | OMIM    |
| APC  | Disorders of pigmentation                                | 1.23 (0.3-4.95)      | 0.78 (0.16-3.95)     |                        | 1.01 (0.35-2.91)     | 0.979    | 0.68 | OMIM    |
| APC  | Gastritis and duodenitis                                 | 3.32 (0.98-11.25)    | 9.43 (3.66-24.31)    | 2.91 (1.16-7.29)       | 4.66 (2.61-8.33)     | 1.34E-06 | 0.18 |         |
| APC  | Malignant neoplasm of other connective and soft tissue   | 14.36 (2.33-88.52)   | 2 (0.46-8.77)        | 22.61 (2.02-253.08)    | 5.93 (2.1-16.71)     | 0.00346  | 0.12 | OMIM    |
| APC  | Malignant neoplasm of the colon and rectum               | 2.48 (0.37-16.55)    | 1.34 (0.47-3.84)     | 21.84 (7.13-66.9)      | 4.51 (2.22-9.2)      | 0.000182 | 0    | Primary |
| APC  | Other diseases of teeth and supporting structures        | 1.97 (0.31-12.49)    |                      | 11.82 (1.23-113.3)     | 4.04 (0.97-16.87)    | 0.0557   | 0.23 | OMIM    |
| APC  | Sebaceous cyst                                           | 0.88 (0.17-4.6)      | 1.24 (0.22-7.02)     | 7.91 (1.47-42.68)      | 2.05 (0.77-5.44)     | 0.355    | 0.15 | OMIM    |
| ATM  | Abnormal findings in semen                               | 15.72 (2.55-96.9)    |                      | 2.9 (0.44-19.36)       | 7 (1.88-26.02)       | 0.00367  | 0.21 | OMIM    |
| ATM  | Bronchiectasis                                           | 1.65 (0.42-6.45)     |                      | 1.19 (0.73-1.94)       | 1.24 (0.78-1.96)     | 0.365    | 0.66 | OMIM    |

|       |                                                     |                     |                   |                  |                   |          |      |         |
|-------|-----------------------------------------------------|---------------------|-------------------|------------------|-------------------|----------|------|---------|
| ATM   | Bronchitis                                          | 1.39 (0.86-2.27)    | 0.11 (0.02-0.73)  | 0.78 (0.47-1.31) | 0.98 (0.69-1.39)  | 0.995    | 0.02 | OMIM    |
| ATM   | Decreased white blood cell count                    | 2.19 (1-4.83)       | 1.28 (0.45-3.62)  | 1.65 (1.09-2.49) | 1.69 (1.2-2.39)   | 0.0109   | 0.7  | OMIM    |
| ATM   | Diabetes mellitus                                   | 1.13 (0.67-1.91)    | 0.35 (0.09-1.4)   | 1.13 (0.93-1.39) | 1.11 (0.92-1.34)  | 0.557    | 0.26 | OMIM    |
| ATM   | Disease of capillaries                              | 1.33 (0.43-4.08)    | 2.06 (0.33-12.95) | 1.5 (0.56-4.05)  | 1.5 (0.75-2.99)   | 0.515    | 0.92 | OMIM    |
| ATM   | Dysarthria                                          | 1.95 (0.32-11.7)    |                   | 0.89 (0.18-4.3)  | 1.25 (0.38-4.09)  | 0.711    | 0.52 | OMIM    |
| ATM   | Dystonia                                            | 0.49 (0.12-2.04)    | 2.68 (0.4-18)     |                  | 0.9 (0.29-2.83)   | 0.858    | 0.16 | OMIM    |
| ATM   | Elevated blood glucose level                        | 0.95 (0.54-1.67)    | 0.55 (0.17-1.81)  | 0.72 (0.3-1.75)  | 0.82 (0.53-1.28)  | 0.691    | 0.68 | OMIM    |
| ATM   | Epilepsy, recurrent seizures, convulsions           | 0.92 (0.42-2.03)    | 0.41 (0.04-4.62)  | 1.54 (1.03-2.3)  | 1.35 (0.95-1.92)  | 0.245    | 0.32 | OMIM    |
| ATM   | Folate-deficiency anemia                            | 31.13 (4.45-217.63) |                   | 1.66 (0.43-6.41) | 4.31 (1.42-13.09) | 0.00985  | 0.02 | OMIM    |
| ATM   | Lack of coordination                                | 4.24 (2.07-8.68)    | 0.86 (0.06-13.27) | 1.85 (0.58-5.91) | 3.16 (1.75-5.74)  | 0.000745 | 0.31 | OMIM    |
| ATM   | Leukemia                                            | 1.7 (0.29-9.84)     |                   | 2.46 (1.35-4.47) | 2.37 (1.34-4.17)  | 0.00283  | 0.7  | OMIM    |
| ATM   | Malignant neoplasm of stomach                       | 4.62 (0.61-34.79)   |                   | 4.24 (2.27-7.9)  | 4.27 (2.35-7.74)  | 1.8E-06  | 0.94 |         |
| ATM   | Malignant neoplasm of the breast, female            | 2.57 (1.22-5.43)    | 1.17 (0.56-2.43)  | 2.69 (1.4-5.17)  | 2.05 (1.36-3.08)  | 0.00275  | 0.2  | Primary |
| ATM   | Malignant neoplasm of the pancreas                  | 2.54 (0.39-16.39)   | 3.68 (0.77-17.52) | 4.79 (2.72-8.43) | 4.44 (2.66-7.4)   | 7.88E-08 | 0.79 |         |
| ATM   | Megaloblastic anemia                                | 5.53 (2.16-14.13)   | 0.6 (0.05-7.84)   | 0.96 (0.49-1.88) | 1.66 (0.97-2.83)  | 0.18     | 0.01 | OMIM    |
| ATM   | Non-Hodgkin lymphoma                                | 3.84 (1.22-12.08)   |                   | 1.62 (0.94-2.8)  | 1.9 (1.16-3.11)   | 0.0104   | 0.18 | OMIM    |
| ATM   | Sinusitis                                           | 1.02 (0.64-1.63)    | 0.2 (0.05-0.71)   | 0.68 (0.43-1.1)  | 0.76 (0.55-1.05)  | 0.262    | 0.05 | OMIM    |
| ATM   | Strabismus and disorders of binocular eye movements | 1.51 (0.6-3.78)     |                   | 0.73 (0.3-1.76)  | 1.03 (0.55-1.95)  | 0.917    | 0.26 | OMIM    |
| ATM   | Tremor                                              | 1.1 (0.31-3.97)     |                   | 0.56 (0.18-1.74) | 0.76 (0.32-1.76)  | 0.516    | 0.44 | OMIM    |
| BRCA1 | Benign neoplasms of the ovary                       | 6.61 (2.35-18.6)    | 3.24 (1.45-7.23)  |                  | 4.24 (2.25-7.99)  | 8.09E-06 | 0.29 | OMIM    |

|       |                                                             |                     |                     |                     |                   |          |      |         |
|-------|-------------------------------------------------------------|---------------------|---------------------|---------------------|-------------------|----------|------|---------|
| BRCA1 | Gynecological benign neoplasms                              | 2.84 (1.61-4.99)    | 1.51 (0.9-2.54)     | 0.98 (0.56-1.72)    | 1.61 (1.17-2.2)   | 0.0131   | 0.03 | OMIM    |
| BRCA1 | Malignant neoplasm of retroperitoneum and peritoneum        |                     | 3.29 (1.16-9.33)    | 25.69 (6.26-105.36) | 6.8 (2.94-15.72)  | 7.46E-06 | 0.02 | OMIM    |
| BRCA1 | Malignant neoplasm of the breast, female                    | 7.79 (4.28-14.19)   | 0.8 (0.52-1.24)     | 32.78 (13-82.67)    | 2.55 (1.84-3.55)  | 1.8E-07  | 0    | Primary |
| BRCA1 | Malignant neoplasm of the fallopian tube and uterine adnexa | 31.03 (4.42-217.96) | 5.68 (2.29-14.11)   | 91.32 (18.6-448.41) | 13 (6.25-27.03)   | 5.88E-11 | 0.01 | Primary |
| BRCA1 | Malignant neoplasm of the ovary                             | 3.25 (0.72-14.61)   | 3.13 (1.73-5.66)    | 18.36 (8.01-42.1)   | 5.4 (3.41-8.54)   | 5.63E-12 | 0    | Primary |
| BRCA1 | Ovarian cyst                                                | 5.91 (3.4-10.29)    | 1.8 (1.05-3.07)     | 2.94 (1.3-6.64)     | 3.15 (2.22-4.46)  | 9.09E-10 | 0.01 |         |
| BRCA1 | Vitamin D deficiency                                        | 0.51 (0.28-0.93)    | 0.17 (0.08-0.38)    | 0.58 (0.34-0.98)    | 0.44 (0.31-0.62)  | 2.66E-05 | 0.04 |         |
| BRCA2 | Chromosomal anomalies                                       | 0.99 (0.2-4.96)     | 0.91 (0.06-14.97)   | 9.08 (1.67-49.42)   | 2.4 (0.82-7.04)   | 0.283    | 0.14 | OMIM    |
| BRCA2 | Malignant neoplasm of kidney, except pelvis                 | 1.1 (0.21-5.66)     | 0.96 (0.26-3.52)    | 0.49 (0.12-2)       | 0.79 (0.34-1.8)   | 0.851    | 0.71 | OMIM    |
| BRCA2 | Malignant neoplasm of the breast, female                    | 4.62 (2.72-7.84)    | 0.88 (0.56-1.38)    | 7.54 (3.75-15.13)   | 2.36 (1.73-3.21)  | 3.71E-07 | 0    | Primary |
| BRCA2 | Malignant neoplasm of the breast, male                      | 31.16 (2.51-386.62) | 3.18 (0.4-25.04)    |                     | 7.95 (1.61-39.27) | 0.0109   | 0.17 | OMIM    |
| BRCA2 | Malignant neoplasm of the ovary                             | 2.94 (0.84-10.31)   | 2.42 (1.28-4.6)     | 10.55 (6.23-17.86)  | 5.46 (3.71-8.05)  | 8.72E-17 | 0    | Primary |
| BRCA2 | Malignant neoplasm of the pancreas                          | 4.7 (1.45-15.2)     | 3.43 (1.37-8.59)    | 3.56 (1.49-8.51)    | 3.74 (2.14-6.52)  | 2.12E-05 | 0.91 | Primary |
| BRCA2 | Ovarian cyst                                                | 4.07 (2.56-6.48)    | 2.64 (1.56-4.46)    | 2.72 (1.71-4.33)    | 3.12 (2.36-4.12)  | 1.29E-14 | 0.37 |         |
| CHEK2 | Histocytoses                                                |                     | 32.13 (2.35-439.03) | 3.34 (0.48-23.17)   | 7.45 (1.57-35.31) | 0.0114   | 0.17 | OMIM    |
| CHEK2 | Leukemia                                                    | 4.42 (2.18-8.94)    | 5.04 (1-25.41)      | 3.52 (2.26-5.47)    | 3.81 (2.64-5.48)  | 6.18E-12 | 0.81 |         |
| CHEK2 | Malignant neoplasm of brain                                 | 1.03 (0.35-2.98)    | 1.41 (0.25-8.03)    | 0.85 (0.35-2.11)    | 0.98 (0.52-1.86)  | 0.998    | 0.88 | OMIM    |

|       |                                                                  |                          |                      |                        |                       |          |      |         |
|-------|------------------------------------------------------------------|--------------------------|----------------------|------------------------|-----------------------|----------|------|---------|
| CHEK2 | Malignant neoplasm of eye                                        | 2.36 (0.37-14.98)        |                      | 1.81 (0.65-5.04)       | 1.93 (0.79-4.72)      | 0.151    | 0.8  | OMIM    |
| CHEK2 | Malignant neoplasm of other connective and soft tissue           | 1.16 (0.45-3.04)         | 3.38 (1.06-10.79)    | 2.27 (1.09-4.7)        | 2.02 (1.2-3.4)        | 0.0294   | 0.35 | OMIM    |
| CHEK2 | Malignant neoplasm of the breast                                 | 1.34 (0.84-2.16)         | 1.34 (0.72-2.48)     | 1.9 (1.58-2.3)         | 1.77 (1.5-2.1)        | 2.18E-10 | 0.27 | Primary |
| CHEK2 | Malignant neoplasm of the prostate                               | 2.22 (1.25-3.96)         | 2.57 (0.33-19.95)    | 1.87 (1.47-2.4)        | 1.93 (1.54-2.42)      | 7.52E-08 | 0.84 | OMIM    |
| CHEK2 | Malignant sarcoma-related cancers                                | 1.25 (0.82-1.91)         | 2.35 (1.06-5.18)     | 1.6 (0.88-2.93)        | 1.48 (1.08-2.03)      | 0.0525   | 0.37 | Primary |
| CHEK2 | Multiple myeloma and malignant plasma cell neoplasms             | 2.66 (0.9-7.9)           |                      | 3.28 (1.79-5.98)       | 3.12 (1.84-5.28)      | 0.000023 | 0.74 |         |
| MEN1  | Acute pancreatitis                                               | 48.47 (3.07-765.51)      | 27.26 (4.68-158.68)  | 37.49 (2.86-490.91)    | 33.45 (9.25-121.02)   | 6.09E-07 | 0.94 |         |
| MEN1  | Benign neoplasm of the pancreas                                  | 266.57 (12.16-5843.78)   | 18.97 (2.54-141.44)  |                        | 41.64 (7.73-224.28)   | 1.42E-05 | 0.16 | OMIM    |
| MEN1  | Benign neoplasm of the parathyroid gland                         | 170.61 (8.48-3431.59)    | 37.21 (8.48-163.3)   |                        | 50.11 (13.3-188.81)   | 7.34E-09 | 0.37 | OMIM    |
| MEN1  | Benign neoplasm of the pituitary gland and craniopharyngeal duct | 653.31 (42.56-10027.9)   | 54.06 (11.77-248.34) |                        | 97.73 (25.81-370.01)  | 1.52E-11 | 0.12 | OMIM    |
| MEN1  | Benign neuroendocrine tumors                                     | 1392.98 (83.09-23351.94) | 55.25 (14.43-211.51) |                        | 100.32 (29.85-337.12) | 9.2E-14  | 0.04 | Primary |
| MEN1  | Diarrhea                                                         | 2.82 (0.28-28.46)        | 0.45 (0.09-2.21)     |                        | 0.81 (0.22-3.01)      | 0.755    | 0.2  | OMIM    |
| MEN1  | Disorders of calcium metabolism                                  | 60.04 (4.86-741.21)      | 9.65 (2.59-36.04)    | 112.68 (12.31-1031.14) | 22.41 (7.98-62.92)    | 2.68E-08 | 0.12 | OMIM    |
| MEN1  | Disorders of the pituitary gland and its hypothalamic control    | 187.9 (13.94-2532.25)    | 47.11 (12.23-181.52) | 64.42 (4.35-954.33)    | 63.37 (21.21-189.29)  | 1.02E-12 | 0.65 | OMIM    |



|      |                                             |                             |                          |                         |                           |          |      |         |
|------|---------------------------------------------|-----------------------------|--------------------------|-------------------------|---------------------------|----------|------|---------|
| MEN1 | Hypercalcemia                               | 110.96 (8.62-1428.34)       | 10.9 (2.61-45.56)        |                         | 18.96 (5.44-66.03)        | 3.8E-06  | 0.12 | OMIM    |
| MEN1 | Hypoparathyroidism                          | 183.33 (8.99-3738.77)       | 41.95 (4.98-353.04)      |                         | 68.54 (12.03-390.42)      | 1.91E-06 | 0.43 | OMIM    |
| MEN1 | Malignant neoplasm of kidney, except pelvis |                             | 0.57 (0.04-8.24)         | 159.31 (8.64-2938.69)   | 7.47 (1.04-53.56)         | 0.0455   | 0.01 | OMIM    |
| MEN1 | Malignant neoplasm of the adrenal gland     |                             | 2.35 (0.33-16.65)        | 860.65 (33.67-21996.86) | 11.39 (2.13-60.84)        | 0.00444  | 0    | OMIM    |
| MEN1 | Malignant neoplasm of the endocrine glands  |                             | 3.97 (1.06-14.82)        | 213.8 (29.15-1568.21)   | 13.35 (4.45-40.08)        | 3.83E-06 | 0    | OMIM    |
| MEN1 | Malignant neoplasm of the pancreas          | 148.01 (7.56-2896.3)        | 21.31 (5.56-81.62)       | 172 (9.27-3191.69)      | 38.49 (12.45-119)         | 1.89E-09 | 0.28 | OMIM    |
| MEN1 | Malignant neuroendocrine tumors             | 306.21 (13.6-6894.77)       | 53.31 (13.91-204.3)      |                         | 70.14 (20.43-240.81)      | 1.44E-11 | 0.31 | Primary |
| MEN1 | Multiple endocrine neoplasia [MEN] type I   | 24879.04 (992.77-623473.77) | 2334.9 (401.38-13582.37) |                         | 4024.03 (858.33-18865.46) | 6.34E-26 | 0.21 | OMIM    |
| MEN1 | Other specified diabetes*                   |                             | 40.14 (4.8-335.46)       | 347.53 (16.4-7362.77)   | 81.11 (14.19-463.6)       | 7.71E-07 | 0.26 | OMIM    |
| MEN1 | Peptic ulcer                                | 17.45 (1.33-228.23)         | 2.18 (0.31-15.18)        |                         | 4.64 (0.98-21.83)         | 0.0523   | 0.21 | OMIM    |
| MEN1 | Primary hyperparathyroidism                 | 359.87 (25.02-5175.25)      | 380.91 (78.61-1845.63)   | 336.02 (29.67-3805.14)  | 365.56 (111.76-1195.71)   | 2.05E-21 | 1    | OMIM    |
| MEN1 | Secondary hyperparathyroidism, non-renal    | 183.33 (8.99-3738.77)       | 27.09 (3.45-212.41)      | 355.21 (16.65-7575.97)  | 79.13 (17.9-349.89)       | 6.12E-08 | 0.32 | OMIM    |
| MLH1 | Benign neoplasm of the skin                 | 1.32 (0.42-4.13)            | 0.48 (0.1-2.23)          | 1.54 (0.49-4.84)        | 1.12 (0.55-2.3)           | 0.949    | 0.46 | OMIM    |
| MLH1 | Diverticula of colon                        | 1.51 (0.43-5.31)            | 0.65 (0.13-3.23)         | 1.42 (0.73-2.75)        | 1.31 (0.76-2.27)          | 0.626    | 0.66 | OMIM    |
| MLH1 | Malignant neoplasm of the colon and rectum  | 34.79 (10.79-112.13)        | 4.92 (1.5-16.07)         | 13.67 (6.66-28.04)      | 13.48 (7.82-23.22)        | 8.43E-20 | 0.07 | Primary |
| MLH1 | Malignant neoplasm of the ovary             |                             | 1.54 (0.25-9.54)         | 7.74 (1.45-41.31)       | 3.7 (1.08-12.69)          | 0.0376   | 0.2  | OMIM    |
| MLH1 | Malignant sarcoma-related cancers           | 3.95 (1-15.67)              | 0.72 (0.14-3.71)         | 4.31 (0.59-31.66)       | 2.32 (0.91-5.89)          | 0.208    | 0.23 | OMIM    |

|      |                                                                                |                     |                    |                   |                    |          |      |         |
|------|--------------------------------------------------------------------------------|---------------------|--------------------|-------------------|--------------------|----------|------|---------|
| MLH1 | Other dyschromia                                                               | 2.49 (0.67-9.3)     | 0.36 (0.03-3.95)   | 6.18 (0.77-49.83) | 2.18 (0.79-5.99)   | 0.319    | 0.21 | OMIM    |
| MLH1 | Other non-epithelial malignant neoplasm of skin                                | 1.39 (0.24-8.13)    | 0.82 (0.16-4.26)   | 1.48 (0.66-3.31)  | 1.33 (0.68-2.6)    | 0.71     | 0.82 | OMIM    |
| MLH1 | Ulceration of the lower GI tract                                               | 26.8 (5.15-139.47)  | 12.39 (1.98-77.46) |                   | 18.97 (5.57-64.67) | 2.54E-06 | 0.54 |         |
| MSH2 | Actinic keratosis                                                              | 5.11 (1.71-15.29)   | 1.44 (0.36-5.78)   | 1.97 (0.69-5.56)  | 2.6 (1.34-5.04)    | 0.0186   | 0.3  | OMIM    |
| MSH2 | Basal cell carcinoma                                                           | 5.01 (0.98-25.51)   | 1.09 (0.2-5.95)    |                   | 2.41 (0.75-7.82)   | 0.141    | 0.2  | OMIM    |
| MSH2 | Benign neoplasm of the anus and anal canal                                     | 7.63 (2.29-25.4)    | 0.34 (0.03-3.67)   | 1.1 (0.21-5.62)   | 2.73 (1.11-6.69)   | 0.0896   | 0.03 | OMIM    |
| MSH2 | Benign neoplasm of the colon and rectum                                        | 8.15 (2.95-22.51)   | 2.46 (1.06-5.68)   | 1.44 (0.99-2.1)   | 1.87 (1.35-2.59)   | 0.000892 | 0.01 | OMIM    |
| MSH2 | Benign neoplasm of the skin                                                    | 4.1 (1.51-11.1)     | 1.05 (0.37-2.98)   | 0.79 (0.35-1.78)  | 1.38 (0.8-2.37)    | 0.503    | 0.04 | OMIM    |
| MSH2 | Benign neoplasm of the small intestine                                         | 46.41 (6.13-351.28) |                    | 7.24 (0.86-61.17) | 19.25 (4.43-83.61) | 7.88E-05 | 0.22 | OMIM    |
| MSH2 | Diverticula of colon                                                           | 3.98 (1.42-11.17)   | 1.01 (0.32-3.18)   | 1.02 (0.68-1.54)  | 1.21 (0.84-1.73)   | 0.596    | 0.05 | OMIM    |
| MSH2 | Malignant neoplasm of stomach                                                  | 26.14 (2.23-306.92) |                    | 1.83 (0.31-10.77) | 4.53 (1.08-19.09)  | 0.0394   | 0.09 | OMIM    |
| MSH2 | Malignant neoplasm of the breast, female                                       | 7.24 (1.87-27.98)   | 0.04 (0.01-0.23)   | 1.98 (0.33-11.97) | 1.17 (0.47-2.9)    | 0.945    | 0    | OMIM    |
| MSH2 | Malignant neoplasm of the colon and rectum                                     | 32.78 (10.93-98.3)  | 4.62 (1.81-11.76)  | 2.4 (1.22-4.73)   | 4.84 (2.97-7.91)   | 2.34E-09 | 0    | Primary |
| MSH2 | Malignant neoplasm of the eye, brain and other parts of central nervous system |                     | 2.77 (0.6-12.73)   | 3.27 (0.93-11.54) | 3.06 (1.16-8.08)   | 0.0242   | 0.87 | OMIM    |
| MSH2 | Malignant neoplasm of the prostate                                             | 17.98 (3.16-102.33) | 1.26 (0.21-7.66)   | 1.51 (0.78-2.91)  | 1.95 (1.09-3.49)   | 0.0797   | 0.03 | OMIM    |
| MSH2 | Malignant neoplasm of the skin                                                 | 7.33 (2.66-20.21)   | 1.33 (0.53-3.35)   | 1.85 (1.22-2.82)  | 2.09 (1.46-2.99)   | 0.000288 | 0.03 | OMIM    |

|       |                                                 |                     |                     |                     |                     |          |      |         |
|-------|-------------------------------------------------|---------------------|---------------------|---------------------|---------------------|----------|------|---------|
| MSH2  | Malignant neoplasm of the uterus                | 41.51 (8.82-195.37) | 1.4 (0.24-8.21)     | 2.39 (0.71-8.03)    | 4.91 (2.12-11.37)   | 0.00103  | 0.01 | Primary |
| MSH2  | Malignant sarcoma-related cancers               | 10.57 (3.52-31.75)  | 1.07 (0.33-3.41)    | 1.34 (0.25-7.22)    | 2.99 (1.45-6.15)    | 0.0121   | 0.01 | OMIM    |
| MSH2  | Other dyschromia                                | 3.91 (1.25-12.23)   | 0.75 (0.15-3.7)     | 1.95 (0.33-11.62)   | 2.18 (0.96-4.96)    | 0.18     | 0.25 | OMIM    |
| MSH2  | Other non-epithelial malignant neoplasm of skin | 4.49 (1.29-15.56)   | 1.72 (0.57-5.16)    | 1.77 (1.12-2.82)    | 1.95 (1.3-2.91)     | 0.00515  | 0.38 | OMIM    |
| MSH2  | Seborrheic keratosis                            | 5.84 (2.14-15.96)   | 0.48 (0.11-2.12)    | 1.33 (0.44-4.01)    | 2.07 (1.06-4.03)    | 0.101    | 0.01 | OMIM    |
| MSH6  | Basal cell carcinoma                            | 2.53 (0.84-7.57)    | 0.55 (0.04-7.2)     |                     | 2 (0.73-5.48)       | 0.179    | 0.28 | OMIM    |
| MSH6  | Lymphoma                                        | 1.64 (0.28-9.47)    |                     | 1.93 (0.6-6.24)     | 1.84 (0.69-4.87)    | 0.221    | 0.88 | OMIM    |
| MSH6  | Malignant neoplasm of the bladder               | 8.3 (2.33-29.54)    | 18.98 (4.32-83.3)   | 2.28 (0.79-6.61)    | 5.63 (2.75-11.49)   | 1.33E-05 | 0.06 |         |
| MSH6  | Malignant neoplasm of the colon and rectum      | 5.8 (2.56-13.12)    | 3.92 (1.23-12.49)   | 7.37 (4.41-12.31)   | 6.43 (4.28-9.65)    | 3.63E-18 | 0.6  | Primary |
| MSH6  | Malignant neoplasm of the ovary                 |                     | 4.68 (1.11-19.68)   | 6.74 (2.43-18.73)   | 5.96 (2.59-13.71)   | 2.63E-05 | 0.68 | OMIM    |
| MSH6  | Malignant neoplasm of the uterus                | 13.81 (4.04-47.18)  | 18.88 (5.19-68.59)  | 19.89 (10.28-38.49) | 18.42 (10.84-31.3)  | 6.33E-26 | 0.88 | Primary |
| MSH6  | Malignant sarcoma-related cancers               | 3.1 (1.44-6.67)     | 0.2 (0.02-1.77)     | 4.95 (1.53-16.02)   | 2.83 (1.53-5.24)    | 0.00402  | 0.04 | OMIM    |
| MSH6  | Other dyschromia                                | 0.75 (0.29-1.9)     | 1.08 (0.2-5.95)     |                     | 0.81 (0.36-1.84)    | 0.619    | 0.71 | OMIM    |
| MUTYH | Benign neoplasm of stomach                      |                     | 52.8 (5.67-491.88)  | 6.22 (1.54-25.17)   | 11.36 (3.47-37.16)  | 5.82E-05 | 0.11 | OMIM    |
| MUTYH | Benign neoplasm of the colon and rectum         | 7.39 (1.21-45.06)   | 29.79 (3.16-281.06) | 10.8 (4.92-23.7)    | 11.24 (5.66-22.33)  | 4.33E-11 | 0.62 | Primary |
| MUTYH | Malignant neoplasm of kidney, except pelvis     |                     | 84.13 (8.47-836.11) | 12.57 (1.29-122.74) | 32.28 (6.4-162.73)  | 2.55E-05 | 0.25 |         |
| MUTYH | Malignant neoplasm of the colon and rectum      | 9.59 (0.94-97.48)   | 21.97 (2.63-183.32) | 34.52 (12.74-93.51) | 27.17 (11.72-62.99) | 1.35E-13 | 0.6  | Primary |

|       |                                            |                     |                       |                   |                     |          |      |         |
|-------|--------------------------------------------|---------------------|-----------------------|-------------------|---------------------|----------|------|---------|
| MUTYH | Polycystic ovarian syndrome                | 33.94 (2.3-501.28)  | 53.76 (5.76-502.08)   |                   | 44.57 (7.99-248.73) | 0.000015 | 0.8  |         |
| PALB2 | Malignant neoplasm of the breast           | 3.34 (1.01-11.11)   | 1.94 (0.92-4.1)       | 3.68 (2.59-5.23)  | 3.28 (2.41-4.46)    | 3.8E-13  | 0.32 | Primary |
| PALB2 | Malignant neoplasm of the breast, female   | 1.97 (0.46-8.51)    | 1.62 (0.79-3.35)      | 1.8 (0.46-7.12)   | 1.71 (0.95-3.07)    | 0.203    | 0.97 | OMIM    |
| PALB2 | Malignant neoplasm of the ovary            |                     | 2.39 (0.86-6.68)      | 2.48 (0.85-7.24)  | 2.43 (1.16-5.11)    | 0.0187   | 0.96 | OMIM    |
| PALB2 | Malignant neoplasm of the pancreas         | 12.86 (2.18-76.07)  | 5.23 (1.31-20.89)     | 5.16 (1.93-13.78) | 6.04 (2.91-12.54)   | 8.81E-06 | 0.66 | OMIM    |
| PMS2  | Basal cell carcinoma                       | 1.82 (0.56-5.92)    | 0.49 (0.04-6.14)      |                   | 1.44 (0.49-4.19)    | 0.507    | 0.36 | OMIM    |
| PMS2  | Benign neoplasm of stomach                 | 3.29 (1.06-10.21)   | 3.7 (0.75-18.19)      | 1.17 (0.58-2.36)  | 1.73 (0.99-3.03)    | 0.154    | 0.19 | OMIM    |
| PMS2  | Benign neoplasm of the colon               | 2.06 (1.17-3.61)    | 1.76 (0.63-4.9)       | 0.84 (0.54-1.31)  | 1.23 (0.89-1.71)    | 0.461    | 0.04 | OMIM    |
| PMS2  | Cannabis dependence                        | 15.68 (2.57-95.76)  | 184.31 (8.31-4085.93) |                   | 29.34 (6.15-139.97) | 2.24E-05 | 0.18 |         |
| PMS2  | Leukemia                                   | 4.37 (0.92-20.8)    |                       | 3.2 (1.05-9.69)   | 3.55 (1.44-8.77)    | 0.006    | 0.75 | OMIM    |
| PMS2  | Lymphoma                                   | 1.56 (0.27-8.87)    |                       | 1.79 (0.64-4.96)  | 1.73 (0.72-4.16)    | 0.224    | 0.89 | OMIM    |
| PMS2  | Malignant neoplasm of the colon and rectum | 5.91 (2.7-12.94)    | 3.89 (1.25-12.08)     | 2.65 (1.47-4.79)  | 3.6 (2.33-5.56)     | 6.4E-08  | 0.27 | Primary |
| PMS2  | Malignant neoplasm of the ovary            | 2.86 (0.43-19.23)   | 0.42 (0.04-5)         |                   | 1.4 (0.31-6.35)     | 0.66     | 0.23 | OMIM    |
| PMS2  | Malignant neoplasm of the uterus           | 5.96 (1.49-23.8)    | 1.82 (0.29-11.56)     | 2.41 (0.83-7.02)  | 3.03 (1.41-6.55)    | 0.0184   | 0.5  | OMIM    |
| PMS2  | Malignant sarcoma-related cancers          | 1.04 (0.39-2.75)    | 0.62 (0.13-3.03)      |                   | 0.9 (0.4-2.07)      | 0.813    | 0.58 | OMIM    |
| PMS2  | Other dyschromia                           | 1.36 (0.64-2.92)    | 1 (0.19-5.41)         | 1.59 (0.28-8.94)  | 1.33 (0.7-2.53)     | 0.684    | 0.93 | OMIM    |
| PMS2  | Spermatocele                               | 20.48 (4.14-101.22) | 19.13 (1.51-242.84)   |                   | 20.09 (5.19-77.7)   | 1.38E-05 | 0.96 |         |
| PTEN  | Abnormality of gait and mobility           | 7.23 (2.14-24.39)   |                       | 4.67 (0.6-36.19)  | 6.45 (2.27-18.35)   | 0.000473 | 0.72 | OMIM    |

|      |                                                         |                       |                        |                       |                       |          |      |      |
|------|---------------------------------------------------------|-----------------------|------------------------|-----------------------|-----------------------|----------|------|------|
| PTEN | Autistic disorder                                       | 9.37 (2.65-33.1)      |                        | 109.39 (6.74-1775.77) | 14.23 (4.51-44.94)    | 0.000006 | 0.12 | OMIM |
| PTEN | Benign neoplasm of the colon and rectum                 | 1.03 (0.31-3.45)      | 5.57 (0.7-44.48)       | 3.9 (1.49-10.2)       | 2.58 (1.27-5.24)      | 0.0319   | 0.18 | OMIM |
| PTEN | Benign neoplasm of the genitourinary system             |                       | 94.85 (5.27-1707.4)    | 40.91 (3.15-531.97)   | 59.25 (8.7-403.62)    | 3.05E-05 | 0.67 | OMIM |
| PTEN | Benign neoplasm of the skin                             | 0.39 (0.09-1.73)      | 7.92 (1.03-60.77)      |                       | 1.12 (0.33-3.75)      | 0.856    | 0.02 | OMIM |
| PTEN | Chronic gastritis                                       | 3.84 (0.51-28.68)     | 15.93 (1.3-194.97)     | 26.06 (7.75-87.58)    | 15.68 (6.01-40.92)    | 1.35E-07 | 0.28 |      |
| PTEN | Congenital deformities of skull, face, and jaw          | 35.22 (8.82-140.72)   | 94.27 (4.81-1847.2)    |                       | 41.97 (11.96-147.34)  | 5.44E-09 | 0.56 | OMIM |
| PTEN | Congenital malformation of the skin                     | 7.14 (1.31-39)        |                        | 93.06 (5.8-1492.69)   | 14.37 (3.38-61.15)    | 0.00031  | 0.12 | OMIM |
| PTEN | Epilepsy, recurrent seizures, convulsions               | 3.33 (0.86-12.9)      |                        | 3.78 (0.52-27.36)     | 3.47 (1.13-10.6)      | 0.0292   | 0.92 | OMIM |
| PTEN | Goiter                                                  | 3.03 (0.63-14.58)     | 17.41 (2.11-143.71)    | 24.68 (5.85-104.08)   | 10.71 (4.15-27.64)    | 0.000006 | 0.14 | OMIM |
| PTEN | Hashimoto thyroiditis [Chronic lymphocytic thyroiditis] | 15.59 (2.42-100.34)   |                        | 76.87 (4.7-1258.15)   | 25.46 (5.41-119.89)   | 4.23E-05 | 0.35 | OMIM |
| PTEN | Hearing impairment                                      | 2.97 (1-8.85)         | 5.5 (0.57-53.15)       | 5.22 (1.03-26.42)     | 3.76 (1.62-8.72)      | 0.00855  | 0.8  | OMIM |
| PTEN | Hemangioma                                              | 2.1 (0.32-13.53)      | 8.73 (0.83-91.89)      | 19.05 (3-121.01)      | 6.87 (2.18-21.63)     | 0.00439  | 0.25 | OMIM |
| PTEN | Hereditary ataxia                                       | 43.28 (3.26-573.85)   |                        | 100.73 (6.16-1645.74) | 63.9 (9.58-426.02)    | 1.75E-05 | 0.66 | OMIM |
| PTEN | Hypoglycemia                                            | 4.53 (0.58-35.3)      | 42.22 (2.9-613.82)     |                       | 10.36 (2.03-52.79)    | 0.00491  | 0.19 | OMIM |
| PTEN | Hypothyroidism                                          | 1.51 (0.35-6.46)      | 0.7 (0.04-12.23)       | 4.74 (1.63-13.81)     | 2.8 (1.23-6.38)       | 0.0498   | 0.28 | OMIM |
| PTEN | Lipoma                                                  | 3.86 (0.79-18.94)     | 13.1 (1.11-154.2)      | 4.53 (0.93-22.09)     | 5.09 (1.83-14.13)     | 0.00762  | 0.7  | OMIM |
| PTEN | Macrocephaly*                                           | 119.88 (18.44-779.54) | 318.89 (13.28-7658.59) |                       | 154.23 (30.73-774.07) | 9.26E-10 | 0.6  | OMIM |
| PTEN | Malignant neoplasm of the endocrine glands              | 12.11 (2.01-72.9)     | 10.05 (0.93-109.11)    |                       | 11.32 (2.7-47.5)      | 0.000912 | 0.9  | OMIM |
| PTEN | Malignant neoplasm of the kidney                        |                       | 12.64 (0.98-163.72)    | 12.94 (1.31-128.05)   | 12.81 (2.32-70.67)    | 0.00343  | 0.99 | OMIM |

|      |                                                      |                          |                       |                            |                         |          |      |         |
|------|------------------------------------------------------|--------------------------|-----------------------|----------------------------|-------------------------|----------|------|---------|
| PTEN | Malignant neoplasm of the thyroid                    | 20.92 (3.15-139.01)      | 17.24 (1.43-207.96)   |                            | 19.49 (4.32-87.99)      | 0.000113 | 0.9  | Primary |
| PTEN | Myopia                                               | 1.16 (0.29-4.69)         |                       | 9.16 (1.01-82.74)          | 2.1 (0.65-6.81)         | 0.217    | 0.12 | OMIM    |
| PTEN | Obesity                                              | 1.29 (0.41-4.05)         | 1.89 (0.23-15.4)      | 1.41 (0.36-5.53)           | 1.41 (0.63-3.16)        | 0.708    | 0.95 | OMIM    |
| PTEN | Other congenital malformations of circulatory system | 14.84 (2.38-92.33)       |                       | 54.52 (3.9-762.4)          | 22.63 (5.04-101.71)     | 4.73E-05 | 0.43 | OMIM    |
| PTEN | Phakomatosis                                         | 493.07 (115.64-2102.41)  | 744.3 (64.79-8550.79) | 445.78 (38.81-5120.18)     | 525.83 (173.23-1596.13) | 2.77E-27 | 0.95 | OMIM    |
| PTEN | Postprocedural hypothyroidism                        | 12.93 (2.1-79.74)        |                       | 23.66 (3.49-160.42)        | 17.22 (4.61-64.39)      | 2.33E-05 | 0.65 | OMIM    |
| PTEN | Respiratory failure                                  | 2.17 (0.33-14.12)        |                       | 5.28 (0.66-42.08)          | 3.23 (0.8-12.99)        | 0.0982   | 0.53 | OMIM    |
| PTEN | Strabismus and disorders of binocular eye movements  | 4.5 (0.89-22.63)         |                       | 12.97 (1.32-127.2)         | 6.41 (1.71-23.95)       | 0.00578  | 0.46 | OMIM    |
| PTEN | Thyroiditis                                          | 9.81 (1.66-58.06)        |                       | 39.79 (3.09-512.2)         | 15.49 (3.6-66.66)       | 0.000233 | 0.38 | OMIM    |
| RB1  | Blindness and low vision                             | 130.16 (9.96-1700.53)    | 19.08 (2.58-140.81)   | 68.94 (4.63-1026.69)       | 45.38 (11.62-177.23)    | 2.88E-07 | 0.48 | OMIM    |
| RB1  | Hemo onc - by cell of origin                         |                          | 4.26 (0.51-35.97)     | 17.84 (2.69-118.37)        | 9.5 (2.31-39.11)        | 0.00183  | 0.33 | OMIM    |
| RB1  | Malignant neoplasm of retina                         | 2883.69 (84.16-98806.94) | 451.34 (64.2-3172.91) | 15416.25 (334.9-709639.53) | 1163.2 (244.56-5532.5)  | 8.09E-18 | 0.23 | Primary |
| RET  | Benign neoplasm of the adrenal gland                 | 4.85 (0.63-37.22)        | 0.42 (0.03-5.3)       |                            | 1.86 (0.38-9.12)        | 0.445    | 0.14 | OMIM    |
| RET  | Constipation                                         | 0.62 (0.26-1.47)         | 0.18 (0.02-1.55)      | 1.64 (0.5-5.35)            | 0.75 (0.39-1.46)        | 0.694    | 0.17 | OMIM    |
| RET  | Diarrhea                                             | 0.77 (0.33-1.76)         | 0.81 (0.2-3.28)       |                            | 0.78 (0.38-1.59)        | 0.495    | 0.94 | OMIM    |
| RET  | Diplopia                                             | 9.9 (3.04-32.23)         | 7.99 (0.82-77.72)     |                            | 9.46 (3.32-26.97)       | 2.61E-05 | 0.87 |         |
| RET  | Disorders of parathyroid gland                       | 4.18 (1.43-12.27)        | 6.72 (1.88-23.99)     |                            | 5.1 (2.24-11.59)        | 0.000103 | 0.58 | OMIM    |
| RET  | Diverticula of colon                                 | 1.2 (0.53-2.74)          | 0.22 (0.02-2.14)      | 1.02 (0.38-2.78)           | 1 (0.54-1.85)           | 1        | 0.39 | OMIM    |

|      |                                                                   |                          |                         |                     |                          |          |      |         |
|------|-------------------------------------------------------------------|--------------------------|-------------------------|---------------------|--------------------------|----------|------|---------|
| RET  | Elevated blood pressure reading without diagnosis of hypertension | 0.97 (0.32-2.92)         | 0.52 (0.04-6.95)        | 10.76 (1.89-61.26)  | 1.66 (0.69-3.99)         | 0.522    | 0.05 | OMIM    |
| RET  | Fever of unknown origin                                           | 0.26 (0.09-0.74)         | 0.2 (0.02-1.85)         |                     | 0.25 (0.09-0.64)         | 0.00392  | 0.84 | OMIM    |
| RET  | Goiter                                                            | 4.71 (2.04-10.88)        | 3.91 (1.15-13.32)       |                     | 4.44 (2.22-8.86)         | 2.36E-05 | 0.8  | OMIM    |
| RET  | Heart failure                                                     | 2.2 (0.91-5.28)          | 0.61 (0.04-8.76)        | 2.56 (0.58-11.31)   | 2.07 (1-4.28)            | 0.145    | 0.64 | OMIM    |
| RET  | Hemangioma                                                        | 0.74 (0.16-3.53)         | 1.56 (0.25-9.84)        |                     | 1.01 (0.31-3.33)         | 0.987    | 0.55 | OMIM    |
| RET  | Hyperparathyroidism                                               | 1.07 (0.2-5.59)          | 5.44 (1.42-20.79)       |                     | 2.85 (1.01-8.09)         | 0.0485   | 0.13 | OMIM    |
| RET  | Hypertension                                                      | 1.24 (0.64-2.41)         | 1.38 (0.43-4.44)        | 0.48 (0.22-1.05)    | 0.9 (0.57-1.44)          | 0.914    | 0.14 | OMIM    |
| RET  | Hypocalcemia                                                      | 7.01 (2.01-24.49)        | 1.69 (0.26-10.87)       |                     | 4.51 (1.59-12.73)        | 0.0045   | 0.21 | OMIM    |
| RET  | Hypoparathyroidism                                                | 36.09 (8.25-157.84)      | 6.75 (0.71-64.41)       |                     | 21.84 (6.35-75.07)       | 9.89E-07 | 0.22 | OMIM    |
| RET  | Hypothyroidism                                                    | 3.61 (1.71-7.63)         | 7.63 (2.29-25.49)       | 1.3 (0.41-4.16)     | 3.35 (1.92-5.85)         | 0.000118 | 0.11 | OMIM    |
| RET  | Malignant neoplasm of brain                                       | 3.66 (0.51-26.15)        | 0.7 (0.05-10.89)        |                     | 2.09 (0.42-10.33)        | 0.366    | 0.34 | OMIM    |
| RET  | Malignant neoplasm of the adrenal gland                           | 23.99 (3.62-158.94)      | 1.6 (0.25-10.48)        |                     | 6.14 (1.62-23.26)        | 0.00758  | 0.05 | OMIM    |
| RET  | Malignant neoplasm of the endocrine glands                        | 27.37 (11.19-66.97)      | 7.72 (2.33-25.59)       |                     | 17.4 (8.5-35.64)         | 5.77E-15 | 0.1  | Primary |
| RET  | Malignant neoplasm of the thyroid                                 | 39.92 (15.32-104.07)     | 15.77 (4.64-53.6)       |                     | 28.05 (13.19-59.63)      | 4.58E-18 | 0.24 | Primary |
| RET  | Multiple endocrine neoplasia [MEN] type IIA                       | 2471.2 (481.35-12686.93) | 843.16 (165.12-4305.41) |                     | 1440.91 (454.05-4572.67) | 5.25E-35 | 0.36 | OMIM    |
| RET  | Postprocedural hypothyroidism                                     | 22.79 (9.07-57.25)       | 11.77 (3.46-40.07)      | 7.92 (0.91-69.01)   | 16.49 (8.21-33.11)       | 3.23E-14 | 0.55 | OMIM    |
| RET  | Tachycardia                                                       | 1.24 (0.45-3.43)         | 2.07 (0.45-9.59)        | 3.29 (0.47-22.84)   | 1.65 (0.76-3.6)          | 0.447    | 0.65 | OMIM    |
| SDHB | Benign neoplasm of the adrenal gland                              | 30.15 (2.4-378.87)       | 64.94 (8.57-492.31)     | 30.89 (6.07-157.21) | 38.8 (12.48-120.61)      | 2.09E-09 | 0.83 | Primary |
| SDHB | Benign neoplasm of the salivary glands                            |                          | 64.12 (3.7-1110.6)      | 7.55 (0.89-63.92)   | 16.29 (2.95-90.01)       | 0.00138  | 0.24 | OMIM    |

|      |                                                             |                      |                           |                        |                         |          |      |         |
|------|-------------------------------------------------------------|----------------------|---------------------------|------------------------|-------------------------|----------|------|---------|
| SDHB | Disorders of pigmentation                                   | 1.87 (0.27-12.85)    | 3.95 (0.46-34.03)         |                        | 2.61 (0.62-10.96)       | 0.192    | 0.61 | OMIM    |
| SDHB | Dysphagia                                                   | 2.05 (0.29-14.25)    |                           | 2.04 (0.9-4.62)        | 2.04 (0.96-4.33)        | 0.0643   | 1    | OMIM    |
| SDHB | Heart failure                                               | 2.09 (0.3-14.64)     |                           | 1.6 (0.58-4.44)        | 1.69 (0.69-4.19)        | 0.254    | 0.81 | OMIM    |
| SDHB | Malignant neoplasm of the bone and/or cartilage             |                      | 13.15 (1.16-149.19)       | 20.3 (3.21-128.6)      | 17.32 (3.98-75.29)      | 0.000143 | 0.78 | OMIM    |
| SDHB | Malignant neoplasm of kidney, except pelvis                 |                      | 5.51 (0.55-55.54)         | 5.87 (1.5-22.92)       | 5.77 (1.78-18.67)       | 0.00342  | 0.96 | OMIM    |
| SDHB | Malignant neoplasm of retroperitoneum and peritoneum        |                      | 21.44 (1.72-267.51)       | 11.52 (1.22-108.54)    | 15.15 (2.83-81.03)      | 0.00149  | 0.72 | OMIM    |
| SDHB | Malignant neoplasm of stomach                               | 67.37 (4.49-1010.56) |                           | 6.61 (1.29-33.86)      | 12.28 (3.03-49.74)      | 0.000441 | 0.15 | Primary |
| SDHB | Malignant neoplasm of the adrenal gland                     |                      | 25.34 (3.15-204.02)       | 61.42 (7.75-486.79)    | 39.58 (9.11-172.04)     | 9.26E-07 | 0.55 | OMIM    |
| SDHB | Malignant neoplasm of the aortic body and other paraganglia |                      | 1047.17 (101.81-10771.02) | 354.34 (71.59-1753.81) | 501.26 (134.08-1873.99) | 2.45E-20 | 0.45 | OMIM    |
| SDHB | Malignant neoplasm of the endocrine glands                  |                      | 66.59 (8.38-529.49)       | 13.84 (4.17-45.92)     | 20.52 (7.26-57.96)      | 1.18E-08 | 0.2  | OMIM    |
| SDHB | Malignant neoplasm of the kidney                            |                      | 11.69 (1.56-87.91)        | 5.46 (1.41-21.08)      | 6.91 (2.25-21.23)       | 0.000739 | 0.54 | OMIM    |
| SDHB | Malignant neoplasm of the oral cavity                       |                      | 35.49 (2.54-496.17)       | 4.36 (0.59-32.06)      | 9.35 (1.9-45.93)        | 0.00591  | 0.21 | OMIM    |
| SDHB | Malignant neoplasm of the uterus                            | 57.87 (3.54-945.32)  | 7.07 (0.69-72.24)         | 4.67 (1.23-17.68)      | 7.36 (2.53-21.41)       | 0.00121  | 0.28 | OMIM    |
| SDHB | Migraine with aura                                          | 27.96 (4.68-166.96)  | 11.58 (1.06-126.82)       |                        | 20.39 (4.87-85.38)      | 3.68E-05 | 0.56 | OMIM    |
| SDHB | Palpitations                                                | 1.51 (0.23-9.99)     | 0.87 (0.05-15.38)         | 3.97 (1.62-9.68)       | 3.01 (1.39-6.56)        | 0.0208   | 0.45 | OMIM    |
| SDHB | Secondary hypertension                                      | 8.18 (0.87-76.77)    | 23.08 (2.88-184.99)       | 26.97 (2.32-312.93)    | 17.04 (4.67-62.19)      | 9.95E-05 | 0.73 | OMIM    |



|      |                                                                             |                           |                        |                           |                          |          |      |         |
|------|-----------------------------------------------------------------------------|---------------------------|------------------------|---------------------------|--------------------------|----------|------|---------|
| SDHC | Benign neoplasm of the eye, brain and other parts of central nervous system | 9.72 (1-94.81)            |                        | 4.85 (0.64-36.85)         | 6.59 (1.45-29.99)        | 0.0146   | 0.66 | Primary |
| SDHC | Constipation                                                                | 0.84 (0.14-4.98)          |                        | 0.89 (0.31-2.58)          | 0.88 (0.35-2.18)         | 0.779    | 0.96 | OMIM    |
| SDHC | Disorders of pigmentation                                                   | 1.53 (0.23-10.09)         |                        | 4.83 (0.64-36.62)         | 2.61 (0.66-10.38)        | 0.173    | 0.42 | OMIM    |
| SDHC | Dysphagia                                                                   | 1.86 (0.27-12.73)         |                        | 1.18 (0.32-4.3)           | 1.36 (0.46-3.98)         | 0.577    | 0.7  | OMIM    |
| SDHC | Intestinal obstruction                                                      | 8.07 (0.86-75.47)         |                        | 1.99 (0.33-12.04)         | 3.45 (0.85-14.02)        | 0.0833   | 0.34 | OMIM    |
| SDHC | Palpitations                                                                | 2.41 (0.47-12.41)         |                        | 3.27 (0.92-11.66)         | 2.92 (1.07-7.96)         | 0.0366   | 0.77 | OMIM    |
| SDHD | Benign neoplasm of the carotid body                                         | 3009.81 (86.46-104773.23) | 154.24 (5.24-4539.2)   | 5736.3 (150.04-219304.93) | 1258.09 (164.84-9601.68) | 5.15E-11 | 0.3  | OMIM    |
| SDHD | Chromosomal anomalies                                                       | 41.3 (2.97-574.25)        | 20.48 (1.53-273.71)    |                           | 28.93 (4.56-183.45)      | 0.000356 | 0.71 | OMIM    |
| SDHD | Heart failure                                                               | 3.8 (0.45-32.25)          | 3.83 (0.45-32.59)      | 3.92 (0.53-29.26)         | 3.86 (1.15-12.91)        | 0.0911   | 1    | OMIM    |
| SDHD | Hemangioma                                                                  | 6.75 (0.71-63.89)         | 0.93 (0.05-16.85)      |                           | 3.21 (0.54-18.95)        | 0.199    | 0.29 | OMIM    |
| SDHD | Left heart failure                                                          | 26.52 (2.08-338.88)       |                        | 6.05 (0.73-50.09)         | 11.05 (2.17-56.24)       | 0.0038   | 0.38 | OMIM    |
| SDHD | Malaise and fatigue                                                         | 1.58 (0.27-9.32)          | 0.17 (0.02-1.64)       | 4.07 (0.55-30.21)         | 1.22 (0.39-3.87)         | 0.942    | 0.11 | OMIM    |
| SDHD | Malignant neoplasm of the aortic body and other paraganglia                 | 3668.82 (223.86-60127.13) | 461.89 (57.38-3718.02) | 548.31 (24.27-12389.75)   | 853.09 (195.48-3722.93)  | 3.15E-18 | 0.48 | Primary |
| SDHD | Malignant neoplasm of the carotid body                                      |                           | 447.61 (52.24-3835.18) | 4280.06 (541.63-33821.5)  | 1445.41 (325.93-6410.04) | 1.02E-21 | 0.14 | OMIM    |
| SDHD | Malignant neoplasm of the endocrine glands                                  | 41.91 (5.01-350.16)       | 73.87 (10.32-528.59)   | 90.92 (21.24-389.11)      | 71.77 (25.77-199.87)     | 3.01E-15 | 0.84 | Primary |
| SDHD | Palpitations                                                                | 1.93 (0.26-14.52)         | 0.8 (0.05-13.81)       | 4.18 (0.56-31.28)         | 2.21 (0.62-7.89)         | 0.477    | 0.64 | OMIM    |
| SDHD | Tremor                                                                      |                           | 14.1 (1.18-168.22)     | 22.05 (1.96-247.49)       | 17.73 (3.14-100.11)      | 0.00113  | 0.8  | OMIM    |
| TP53 | Acute leukemia                                                              |                           | 147.26 (14.41-1504.88) | 19.75 (4.15-93.98)        | 36.86 (10.09-134.61)     | 4.82E-08 | 0.16 | OMIM    |
| TP53 | Acute lymphoid leukemia                                                     |                           | 151.09 (8-2855.03)     | 47.84 (3.59-636.92)       | 79.07 (11.33-551.65)     | 1.04E-05 | 0.56 | OMIM    |

|      |                                                                                |                     |                       |                   |                     |          |      |         |
|------|--------------------------------------------------------------------------------|---------------------|-----------------------|-------------------|---------------------|----------|------|---------|
| TP53 | Acute myeloid leukemia                                                         |                     | 198.83 (18.5-2136.95) | 17 (2.77-104.44)  | 42.11 (9.96-178.13) | 3.71E-07 | 0.11 | OMIM    |
| TP53 | Benign neoplasm of other connective and soft tissue                            | 6.13 (0.73-51.57)   | 19.88 (1.66-237.77)   | 7.3 (0.87-61.38)  | 8.97 (2.47-32.49)   | 0.00379  | 0.76 | OMIM    |
| TP53 | Epilepsy, recurrent seizures, convulsions                                      | 8.99 (2.54-31.87)   |                       | 0.96 (0.19-4.75)  | 3.8 (1.41-10.26)    | 0.00837  | 0.03 | OMIM    |
| TP53 | Malignant neoplasm of brain                                                    |                     | 19.88 (1.66-237.77)   | 8.36 (1.56-44.82) | 10.97 (2.73-44.09)  | 0.000734 | 0.57 | OMIM    |
| TP53 | Malignant neoplasm of other connective and soft tissue                         | 18.54 (2.84-120.93) |                       | 5.98 (0.75-47.79) | 11.16 (2.77-44.9)   | 0.000685 | 0.43 | Primary |
| TP53 | Malignant neoplasm of stomach                                                  |                     | 55.85 (3.71-840.22)   | 4.11 (0.57-29.96) | 10.23 (2.06-50.74)  | 0.00444  | 0.13 | OMIM    |
| TP53 | Malignant neoplasm of the breast, female                                       | 10.66 (2.09-54.36)  | 1.18 (0.2-6.83)       | 7.62 (1.42-40.86) | 4.84 (1.83-12.82)   | 0.00642  | 0.16 | Primary |
| TP53 | Malignant neoplasm of the colon and rectum                                     | 3.21 (0.44-23.14)   | 6.34 (0.68-59.4)      | 2.51 (0.94-6.73)  | 2.97 (1.31-6.74)    | 0.0342   | 0.76 | OMIM    |
| TP53 | Malignant neoplasm of the eye, brain and other parts of central nervous system |                     | 15.08 (1.34-169.84)   | 5.28 (1.08-25.84) | 7.24 (1.92-27.32)   | 0.0035   | 0.48 | OMIM    |
| TP53 | Malignant neoplasm of the of bronchus and lung                                 | 14.12 (2.27-87.83)  |                       | 2.22 (0.54-9.19)  | 4.46 (1.45-13.68)   | 0.00899  | 0.12 | OMIM    |
| TP53 | Malignant neoplasm of the prostate                                             | 4.28 (0.51-35.68)   |                       | 0.84 (0.29-2.46)  | 1.17 (0.45-3.06)    | 0.745    | 0.18 | OMIM    |
| TP53 | Malignant neoplasm of the skin                                                 | 5.91 (1.82-19.19)   | 1.76 (0.24-12.99)     | 0.91 (0.43-1.92)  | 1.57 (0.86-2.88)    | 0.336    | 0.03 | OMIM    |
| TP53 | Malignant sarcoma-related cancers                                              | 7.23 (1.9-27.49)    |                       | 3.18 (0.47-21.61) | 5.53 (1.85-16.53)   | 0.00223  | 0.49 | Primary |

|        |                                                                             |                       |                       |                     |                        |          |      |         |
|--------|-----------------------------------------------------------------------------|-----------------------|-----------------------|---------------------|------------------------|----------|------|---------|
| TSC1/2 | Benign neoplasm of the skin                                                 | 2.17 (0.7-6.78)       |                       | 4.78 (0.96-23.78)   | 2.83 (1.12-7.16)       | 0.0281   | 0.43 | OMIM    |
| TSC1/2 | Cyst of kidney                                                              | 9.52 (2.71-33.44)     |                       | 7.24 (0.83-62.74)   | 8.88 (3-26.31)         | 8.12E-05 | 0.83 | OMIM    |
| TSC1/2 | Hypothyroidism                                                              | 0.68 (0.13-3.53)      |                       | 1.61 (0.38-6.74)    | 1.11 (0.38-3.27)       | 0.85     | 0.44 | OMIM    |
| TSC1/2 | Other disorders of the kidney and ureters                                   | 8.19 (2.63-25.56)     |                       | 3.53 (0.49-25.47)   | 6.64 (2.48-17.81)      | 0.000168 | 0.47 | OMIM    |
| VHL    | Benign neoplasm of brain                                                    | 59.62 (4.04-880.71)   | 18.65 (1.54-225.95)   |                     | 31.9 (5.12-198.84)     | 0.000208 | 0.53 | OMIM    |
| VHL    | Benign neoplasm of the adrenal gland                                        | 75.76 (8.63-664.98)   | 9.39 (1.95-45.12)     |                     | 19.22 (5.38-68.6)      | 5.28E-06 | 0.13 | OMIM    |
| VHL    | Benign neoplasm of the endocrine glands                                     | 23.88 (3.25-175.58)   | 6.07 (1.37-26.78)     | 16.58 (1.58-174.53) | 10.99 (3.8-31.8)       | 5.72E-05 | 0.52 | OMIM    |
| VHL    | Benign neoplasm of the eye, brain and other parts of central nervous system | 25.75 (3.47-191.25)   | 21.59 (5.4-86.3)      |                     | 22.85 (7.31-71.45)     | 7.45E-08 | 0.89 | Primary |
| VHL    | Benign neoplasm of the pancreas                                             | 95.44 (5.84-1561.16)  | 17.15 (1.4-210.54)    |                     | 36.88 (5.7-238.43)     | 0.000151 | 0.37 | OMIM    |
| VHL    | Benign neoplasms of external female genital organs and cervix               |                       | 7.93 (0.83-75.61)     | 8.15 (0.89-74.15)   | 8.04 (1.66-38.95)      | 0.00961  | 0.99 | OMIM    |
| VHL    | Congenital malformations of pancreas                                        | 188.04 (9.94-3557.09) | 33.23 (2.43-454.26)   |                     | 71.45 (10.12-504.26)   | 1.85E-05 | 0.39 | OMIM    |
| VHL    | Congenital malformations of spleen                                          | 111.4 (6.6-1880.13)   | 131.16 (4.97-3463.79) |                     | 119.45 (14.07-1014.39) | 1.17E-05 | 0.94 |         |
| VHL    | Cyst and pseudocyst of pancreas                                             | 112.32 (16.05-785.91) | 13.95 (2.15-90.52)    |                     | 37.99 (9.87-146.28)    | 1.24E-07 | 0.13 | OMIM    |
| VHL    | Cyst of kidney                                                              | 20.07 (3.48-115.78)   | 5.2 (1.2-22.54)       | 21.82 (3.28-144.93) | 11.4 (4.34-29.99)      | 5.18E-06 | 0.38 | OMIM    |

|     |                                                                   |                          |                       |                         |                        |          |      |         |
|-----|-------------------------------------------------------------------|--------------------------|-----------------------|-------------------------|------------------------|----------|------|---------|
| VHL | Elevated blood pressure reading without diagnosis of hypertension | 5.96 (0.99-35.77)        | 2.26 (0.33-15.36)     |                         | 3.79 (1.02-14.04)      | 0.0461   | 0.47 | OMIM    |
| VHL | Headache                                                          | 2.06 (0.4-10.57)         | 0.5 (0.1-2.47)        | 2.13 (0.49-9.33)        | 1.33 (0.54-3.27)       | 0.828    | 0.35 | OMIM    |
| VHL | Hemangioma                                                        | 5.22 (0.6-45.31)         | 9.14 (2.53-33.08)     | 16.78 (1.59-176.71)     | 9.05 (3.33-24.6)       | 9.06E-05 | 0.77 | OMIM    |
| VHL | Hypotension                                                       | 6.55 (1.08-39.82)        | 1.75 (0.39-7.85)      | 3.6 (0.49-26.53)        | 3.14 (1.16-8.53)       | 0.0801   | 0.54 | OMIM    |
| VHL | Malignant neoplasm of brain                                       | 111.14 (15.91-776.08)    | 6.73 (1.17-38.59)     | 37.2 (2.93-472.68)      | 25.89 (8.14-82.33)     | 2.51E-07 | 0.1  | Primary |
| VHL | Malignant neoplasm of kidney, except pelvis                       | 158.88 (21.7-1163.37)    | 4.18 (0.96-18.28)     | 43.06 (5.76-322.23)     | 19.85 (7.15-55.13)     | 7.19E-08 | 0.01 | OMIM    |
| VHL | Malignant neoplasm of other connective and soft tissue            | 48.7 (5.94-399.02)       | 1.74 (0.27-11.44)     |                         | 7.65 (1.88-31.1)       | 0.00444  | 0.02 | OMIM    |
| VHL | Malignant neoplasm of spinal cord                                 | 1176.59 (87.28-15860.83) | 94.66 (9.3-964.02)    | 484.55 (21.5-10919.67)  | 326.7 (71.91-1484.2)   | 6.27E-13 | 0.35 | Primary |
| VHL | Malignant neoplasm of the adrenal gland                           | 98.53 (5.99-1620.78)     | 19.15 (4.78-76.79)    |                         | 26.46 (7.63-91.82)     | 2.46E-07 | 0.3  | Primary |
| VHL | Malignant neoplasm of the pancreas                                | 48.75 (3.45-689.2)       | 3.6 (0.71-18.2)       | 32.34 (2.62-399.76)     | 10.33 (3.08-34.7)      | 0.000793 | 0.15 | OMIM    |
| VHL | Medulloadrenal hyperfunction                                      | 802.95 (31.31-20590.13)  | 4.91 (0.57-42.63)     |                         | 23.53 (3.89-142.19)    | 0.00058  | 0.01 | OMIM    |
| VHL | Other diseases of spinal cord                                     | 39.69 (6.41-245.92)      | 7.14 (0.79-64.78)     | 13.38 (1.33-134.14)     | 17.79 (5.36-59.06)     | 1.59E-05 | 0.48 | OMIM    |
| VHL | Other disorders of the brain and CNS                              | 32.05 (5.3-193.83)       | 7.03 (1.54-32.04)     |                         | 13.2 (4.14-42.1)       | 1.29E-05 | 0.21 | OMIM    |
| VHL | Phakomatosis                                                      | 489.93 (58.57-4098.08)   | 171.15 (44.13-663.79) | 429.18 (19.96-9229.13)  | 250.08 (85.71-729.65)  | 6.56E-23 | 0.67 | OMIM    |
| VHL | Stroke                                                            | 3.66 (0.45-29.53)        | 0.62 (0.04-8.95)      |                         | 1.87 (0.36-9.66)       | 0.456    | 0.3  | OMIM    |
| VHL | Syringomyelia and syringobulbia                                   | 122.77 (7.12-2117.3)     | 117.52 (5.75-2400.14) | 667.73 (28.42-15690.28) | 201.42 (35.66-1137.82) | 1.47E-08 | 0.67 | OMIM    |

|     |                                     |                   |                  |                  |                  |       |      |      |
|-----|-------------------------------------|-------------------|------------------|------------------|------------------|-------|------|------|
| VHL | Tachycardia                         | 2.67 (0.35-20.24) | 1.02 (0.18-5.75) |                  | 1.53 (0.41-5.71) | 0.525 | 0.48 | OMIM |
| WT1 | Cataract                            | 2.53 (0.3-21.39)  |                  | 1.41 (0.3-6.56)  | 1.72 (0.5-5.99)  | 0.392 | 0.66 | OMIM |
| WT1 | Hypertension                        | 8.16 (0.76-87.66) |                  | 0.76 (0.2-2.79)  | 1.31 (0.42-4.13) | 0.641 | 0.09 | OMIM |
| WT1 | Malignant neoplasms (excluding BCC) | 0.36 (0.03-4.88)  |                  | 1.76 (0.46-6.76) | 1.26 (0.38-4.17) | 0.708 | 0.29 | OMIM |

OR: odds ratio; CI: confidence interval; OMIM: online Mendelian Inheritance in Man

\*We defined gene-cancer associations with definitive evidence according to ClinGen as the primary gene-cancer association. We did not include WT1 with Wilms tumors as we did not find carriers in our pediatric cohorts. All odds ratio and *P* values were estimated by firth logistic regression models as described in the Methods section. Blank cells indicate no phenotype was found among carriers for the gene in the cohort and thus we were not able to evaluate the association.

**eTable 5. Sensitivity Analyses With Analyses Restricted to European Descendants for All Newly Identified Associations**

| Genes                          | Phenotype               | eMERGE                | HCR                    | UKB                   | Meta                   | P summary | Phet |
|--------------------------------|-------------------------|-----------------------|------------------------|-----------------------|------------------------|-----------|------|
|                                |                         | OR (95% CI)           | OR (95% CI)            | OR (95% CI)           | OR (95% CI)            |           |      |
| <b>Neoplastic diseases</b>     |                         |                       |                        |                       |                        |           |      |
| <i>ATM</i>                     | Gastric cancer          | 5.8 (0.65-21.77)      | -                      | 3.95 (2.17-6.54)      | 4.09 (2.18-7.68)       | 1.19E-05  | 0.73 |
| <i>ATM</i>                     | Pancreatic cancer       | -                     | 3.61 (0.71-11.53)      | 5.04 (3.09-7.74)      | 4.85 (2.84-8.27)       | 7.02E-09  | 0.69 |
| <i>MUTYH</i>                   | Kidney cancer           | -                     | 84.13 (10.92-93.63)    | 12.96 (1.44-50.69)    | 4.05 (1.53-10.73)      | 4.98E-03  | 0.27 |
| <i>MSH6</i>                    | Bladder cancer          | 7.65 (2.44-18.64)     | 17.45 (4.02-60.23)     | 2.41 (0.8-5.54)       | 5.28 (2.54-10.97)      | 4.94E-05  | 0.11 |
| <i>CHEK2</i>                   | Leukemia                | 4.36 (2.31-7.51)      | 5.95 (1.17-19.40)      | 3.57 (2.41-5.07)      | 3.86 (2.68-5.56)       | 4.23E-12  | 0.78 |
| <i>CHEK2</i>                   | Plasma cell neoplasms   | 2.64 (0.87-6.08)      | -                      | 3.13 (1.77-5.09)      | 3 (1.75-5.14)          | 6.17E-05  | 0.79 |
| <i>APC</i>                     | Benign liver/IHBD tumor | 109.71 (19.75-442.34) | 30.86 (5-141.81)       | 169.54 (18.48-691.83) | 70.68 (18.7-267.12)    | 2.77E-09  | 0.57 |
| <b>Non-neoplastic diseases</b> |                         |                       |                        |                       |                        |           |      |
| <i>APC</i>                     | Gastritis/duodenitis    | 4.68 (1.08-17.67)     | 7.99 (2.92-20.59)      | 3.18 (1.19-7.52)      | 4.83 (2.51-9.32)       | 1.59E-05  | 0.47 |
| <i>BRCA1</i>                   | Ovarian cyst            | 6.22 (3.56-10.94)     | 1.80 (1.01-3.07)       | 3.06 (1.39-5.87)      | 3.28 (2.27-4.73)       | 1.96E-09  | 0.01 |
| <i>BRCA2</i>                   | Ovarian cyst            | 4.79 (3.01-7.59)      | 2.3 (1.33-3.84)        | 2.87 (1.86-4.23)      | 3.24 (2.42-4.33)       | 1.84E-14  | 0.12 |
| <i>BRCA1</i>                   | Vitamin D deficiency    | 0.47 (0.21-0.92)      | 0.20 (0.05-0.50)       | 0.66 (0.38-1.07)      | 0.48 (0.34-0.68)       | 2.67E-04  | 0.05 |
| <i>PTEN</i>                    | Chronic gastritis       | 4.1 (0.44-17.34)      | 17.29 (1.48-139.62)    | 3.82 (1.52-8.67)      | 4.52 (1.99-10.25)      | 1.46E-03  | 0.55 |
| <i>MEN1</i>                    | Acute pancreatitis      | 52.85 (4.28-652.99)   | 24.16 (4.95-101.83)    | 41.82 (4.26-211.98)   | 32.68 (9.03-118.36)    | 7.50E-07  | 0.88 |
| <i>MUTYH</i>                   | Polycystic ovaries      | 33.44 (2.71-412.65)   | 2.76 (0.96-6.16)       | -                     | 3.84 (1.44-10.19)      | 6.99E-03  | 0.09 |
| <i>PMS2</i>                    | Cannabis dependence     | 17.64 (3.57-54.09)    | 176.69 (12.29-2407.33) | -                     | 32.21 (6.66-155.87)    | 1.58E-05  | 0.21 |
| <i>RET</i>                     | Diplopia                | 10.26 (3.63-24.09)    | 9.8 (0.93-58.11)       | -                     | 10.16 (3.52-29.32)     | 1.80E-05  | 0.97 |
| <i>MLH1</i>                    | Lower GI ulcer          | 47.63 (11-179.71)     | 17.95 (3.25-68.13)     | -                     | 30.29 (8.31-110.45)    | 2.37E-07  | 0.46 |
| <i>PMS2</i>                    | Spermatocele            | 19.88 (5.08-59.25)    | 5.68 (0.04-70.57)      | -                     | 16.34 (3.76-71.01)     | 1.93E-04  | 0.54 |
| <i>VHL</i>                     | Splenic anomalies       | 132.91 (12.73-824.27) | 168.19 (6.32-35114.78) | -                     | 146.66 (16.33-1316.83) | 8.42E-06  | 0.92 |

OR: odds ratios, CI: confidence interval. GI: gastrointestinal. IHBD: intrahepatic bile duct. Plasma cell neoplasms also include multiple myeloma. We utilized first logistic regression in this PheWAS assuming a dominant model except *MUTYH*, which assumed a recessive model. Due to the scarceness of carriers of *VHL* and *APC* and a low prevalence of cannabis use in HCR, wide CIs were observed, and caution should be exercised when interpreting these results. Cells with dashes indicate no phenotype was found among carriers for the gene in the cohort and thus we were not able to evaluate the association.

**eTable 6. Sensitivity Analyses That Removed Participants With Prior Cancer Diagnoses in New Associations With Noncancer Phenotypes in the UKB Cohort**

| <b>Genes</b> | <b>Phenotypes</b>  | <b>Carriers with the phenotype</b> | <b>Cases</b> | <b>Carriers without phenotypes</b> | <b>Controls</b> | <b>OR (95% CI)</b>  | <b>P</b> |
|--------------|--------------------|------------------------------------|--------------|------------------------------------|-----------------|---------------------|----------|
| <i>BRCA1</i> | Ovarian cyst       | 7                                  | 2685         | 204                                | 184549          | 2.89 (1.29-5.76)    | 0.02     |
| <i>BRCA2</i> | Ovarian cyst       | 18                                 | 2685         | 591                                | 184549          | 2.21 (1.31-3.39)    | 0.003    |
| <i>MEN1</i>  | Acute pancreatitis | 1                                  | 1421         | 6                                  | 185813          | 39.81 (4.12-190.12) | 0.005    |
| <i>PTEN</i>  | Chronic gastritis  | 5                                  | 2570         | 21                                 | 184664          | 20.62 (7.13-50.41)  | 4E-06    |

**eTable 7. Sensitivity Analyses for *CHEK2* in the UKB Cohort**

| Gene                                                                                                                    | Phenotypes                      | Carriers in Cases | Cases | Carriers in controls | Controls | OR (95% CI)      | P      |
|-------------------------------------------------------------------------------------------------------------------------|---------------------------------|-------------------|-------|----------------------|----------|------------------|--------|
| Remove all participants with cancer diagnoses before blood sampling                                                     |                                 |                   |       |                      |          |                  |        |
| <i>CHEK2</i>                                                                                                            | Leukemia                        | 17                | 751   | 1704                 | 186483   | 2.60 (1.63-4.12) | 0.0005 |
| <i>CHEK2</i>                                                                                                            | Malignant plasma cell neoplasms | 12                | 462   | 1709                 | 186772   | 3.12 (1.73-5.24) | 0.0009 |
| Remove all participants with prior cancer diagnoses and those diagnosed with cancer within 3 years after blood sampling |                                 |                   |       |                      |          |                  |        |
| <i>CHEK2</i>                                                                                                            | Leukemia                        | 15                | 666   | 1413                 | 164654   | 2.82 (1.71-4.50) | 0.0006 |
| <i>CHEK2</i>                                                                                                            | Malignant plasma cell neoplasms | 10                | 426   | 1418                 | 164894   | 2.97 (1.50-5.21) | 0.003  |



**eTable 8. Associations of Pathogenic/Likely Pathogenic Variants in *CHEK2* With Subtypes of Leukemia**

| Subtypes of leukemia      | eMERGE            | HCR               | UKB               | Meta              | P summary | Phet |
|---------------------------|-------------------|-------------------|-------------------|-------------------|-----------|------|
|                           | OR (95% CI)       | OR (95% CI)       | OR (95% CI)       | OR (95% CI)       |           |      |
| Acute leukemia            | 5.80 (2.40-14.01) | 4.47 (0.58-34.59) | 4.18 (2.09-8.36)  | 4.72 (2.79-7.99)  | 5.68E-08  | 0.85 |
| Acute lymphoid leukemia   | 7.83 (2.51-24.41) | -                 | 3.08 (0.46-20.79) | 6.13 (2.31-16.29) | 2.75E-04  | 0.41 |
| Acute myeloid leukemia    | 4.80 (1.48-15.62) | 5.87 (0.71-48.86) | 5.09 (2.50-10.36) | 5.07 (2.82-9.11)  | 3.78E-07  | 0.99 |
| Chronic leukemia          | 5.38 (2.12-13.64) | 5.74 (0.69-47.81) | 3.37 (1.91-5.96)  | 3.91 (2.44-6.27)  | 1.19E-07  | 0.66 |
| Chronic lymphoid leukemia | 5.25 (1.78-15.49) | 7.32 (0.82-65.49) | 3.22 (1.69-6.13)  | 3.82 (2.23-6.53)  | 6.20E-06  | 0.63 |

**eTable 9. Associations of *BRCA1* and *BRCA2* With Phenotypes With Phenome-Wide Significance in PheWAS**

| Phenotype                                                              | <i>BRCA1</i>     |          | <i>BRCA2</i>      |          | P het |
|------------------------------------------------------------------------|------------------|----------|-------------------|----------|-------|
|                                                                        | OR (95% CI)      | <i>P</i> | OR (95% CI)       | <i>P</i> |       |
| Malignant neoplasm of the breast                                       | 3.69 (2.81-4.85) | 6.19E-20 | 4.4 (3.6-5.38)    | 1.94E-46 | 0.32  |
| Malignant neoplasms (excluding BCC)                                    | 2.20 (1.78-2.73) | 3.66E-12 | 2.7 (2.34-3.12)   | 3.27E-40 | 0.14  |
| Sequelae of cancer                                                     | 5.04 (3.78-6.72) | 5.09E-27 | 4.08 (3.19-5.22)  | 7.54E-28 | 0.29  |
| Secondary malignant neoplasm                                           | 1.99 (1.47-2.68) | 4.15E-05 | 3.2 (2.6-3.94)    | 6.03E-27 | 0.02  |
| Malignant neoplasm of the ovary                                        | 5.4 (3.41-8.54)  | 5.63E-12 | 5.46 (3.71-8.05)  | 8.72E-17 | 0.97  |
| Malignant neoplasm of other and ill-defined sites                      | 1.58 (1.16-2.15) | 1.57E-02 | 2.37 (1.94-2.89)  | 2.79E-16 | 0.06  |
| Ovarian cyst                                                           | 3.15 (2.22-4.46) | 9.09E-10 | 3.12 (2.36-4.12)  | 1.29E-14 | 0.97  |
| Gynecological malignant neoplasms                                      | 3.18 (2.21-4.57) | 3.43E-09 | 2.91 (2.2-3.85)   | 6.48E-13 | 0.73  |
| Secondary malignancy of lymph nodes                                    | 1.96 (1.37-2.81) | 1.20E-03 | 2.65 (2.02-3.47)  | 1.38E-11 | 0.23  |
| Secondary malignant neoplasm of digestive systems                      | 3.21 (1.96-5.26) | 2.31E-05 | 3.83 (2.63-5.58)  | 2.15E-11 | 0.60  |
| Secondary malignancy of bone                                           | 1.25 (0.63-2.47) | 8.10E-01 | 3.56 (2.45-5.17)  | 2.03E-10 | 0.28  |
| Corpus luteum cyst or hematoma                                         | 3.3 (1.79-6.08)  | 6.79E-04 | 3.24 (2.14-4.91)  | 2.07E-07 | 0.97  |
| Malignant neoplasm of the prostate                                     | 1.45 (0.83-2.55) | 4.32E-01 | 2.49 (1.8-3.44)   | 2.50E-07 | 0.29  |
| Secondary malignant neoplasm of liver                                  | 1.87 (1.06-3.31) | 9.71E-02 | 2.8 (1.94-4.04)   | 2.94E-07 | 0.35  |
| Malignant neoplasm of male genitalia                                   | 1.34 (0.77-2.33) | 5.95E-01 | 2.39 (1.74-3.28)  | 4.79E-07 | 0.31  |
| Pelvic peritoneal adhesions, female (postoperative infection)          | 2.62 (1.41-4.86) | 9.72E-03 | 3.14 (2.02-4.89)  | 2.77E-06 | 0.68  |
| Follicular cyst of ovary                                               | 4.22 (1.8-9.9)   | 4.13E-03 | 4.99 (2.62-9.49)  | 6.13E-06 | 0.79  |
| Secondary malignancy of respiratory organs                             | 2.72 (1.63-4.52) | 6.16E-04 | 2.61 (1.76-3.89)  | 1.23E-05 | 0.92  |
| Noninflammatory disorders of ovary, fallopian tube, and broad ligament | 2.97 (1.84-4.77) | 4.26E-05 | 2.56 (1.72-3.82)  | 2.09E-05 | 0.67  |
| Malignant neoplasm of the pancreas                                     | 0.83 (0.21-3.36) | 7.99E-01 | 3.74 (2.14-6.52)  | 2.12E-05 | 0.05  |
| Elevated cancer antigen 125 [CA 125]                                   | 8.6 (4.10-18.03) | 1.20E-08 | 6.74 (2.77-16.4)  | 2.63E-05 | 0.68  |
| Malignant neoplasm of the fallopian tube and uterine adnexa            | 13 (6.25-27.03)  | 5.88E-11 | 6.13 (2.51-14.98) | 3.73E-04 | 0.24  |

|                                                                                     |                   |          |                  |          |      |
|-------------------------------------------------------------------------------------|-------------------|----------|------------------|----------|------|
| Benign mammary dysplasia                                                            | 2.38 (1.7-3.32)   | 2.28E-06 | 1.78 (1.32-2.39) | 7.78E-04 | 0.24 |
| Benign neoplasms of the ovary                                                       | 4.24 (2.25-7.99)  | 8.09E-06 | 2.69 (1.57-4.58) | 1.39E-03 | 0.31 |
| Malignant neoplasm of retroperitoneum and peritoneum                                | 6.80 (2.94-15.72) | 7.46E-06 | 4.07 (1.89-8.73) | 1.53E-03 | 0.40 |
| Abnormal tumor markers                                                              | 4.05 (2.15-7.64)  | 1.53E-05 | 2.52 (1.24-5.13) | 1.05E-02 | 0.33 |
| Other nonmalignant breast conditions                                                | 2.37 (1.72-3.26)  | 9.09E-07 | 1.53 (1.13-2.05) | 2.05E-02 | 0.08 |
| Other and nonspecific abnormal cytological, histological and immunological findings | 3.83 (2.08-7.05)  | 1.58E-05 | 2.09 (1.05-4.16) | 3.60E-02 | 0.20 |
| Vitamin D deficiency                                                                | 0.43 (0.30-0.62)  | 2.5E-05  | 0.83 (0.61-1.14) | 5.28E-01 | 0.05 |

## eReferences

1. Fossey R, Kochan D, Winkler E, et al. Ethical Considerations Related to Return of Results from Genomic Medicine Projects: The eMERGE Network (Phase III) Experience. *J Pers Med*. Jan 3 2018;8(1)doi:10.3390/jpm8010002
2. Carey DJ, Fetterolf SN, Davis FD, et al. The Geisinger MyCode community health initiative: an electronic health record-linked biobank for precision medicine research. *Genet Med*. Sep 2016;18(9):906-13. doi:10.1038/gim.2015.187
3. Daly MB, Pal T, Berry MP, et al. Genetic/Familial High-Risk Assessment: Breast, Ovarian, and Pancreatic, Version 2.2021, NCCN Clinical Practice Guidelines in Oncology. *J Natl Compr Canc Netw*. Jan 6 2021;19(1):77-102. doi:10.6004/jnccn.2021.0001
4. Bycroft C, Freeman C, Petkova D, et al. The UK Biobank resource with deep phenotyping and genomic data. *Nature*. Oct 11 2018;562(7726):203-+. doi:10.1038/s41586-018-0579-z
5. Laurie G. Role of the UK Biobank Ethics and Governance Council. *Lancet*. Nov 14 2009;374(9702):1676. doi:10.1016/S0140-6736(09)61989-9
6. e MCEaabe, e MC. Harmonizing Clinical Sequencing and Interpretation for the eMERGE III Network. *Am J Hum Genet*. Sep 5 2019;105(3):588-605. doi:10.1016/j.ajhg.2019.07.018
7. Kalia SS, Adelman K, Bale SJ, et al. Recommendations for reporting of secondary findings in clinical exome and genome sequencing, 2016 update (ACMG SF v2.0): a policy statement of the American College of Medical Genetics and Genomics. *Genet Med*. Feb 2017;19(2):249-255. doi:10.1038/gim.2016.190
8. Miller DT, Lee K, Chung WK, et al. ACMG SF v3.0 list for reporting of secondary findings in clinical exome and genome sequencing: a policy statement of the American College of Medical Genetics and Genomics (ACMG). *Genet Med*. Aug 2021;23(8):1381-1390. doi:10.1038/s41436-021-01172-3
9. Wang Q, Dhindsa RS, Carss K, et al. Rare variant contribution to human disease in 281,104 UK Biobank exomes. *Nature*. Sep 2021;597(7877):527-532. doi:10.1038/s41586-021-03855-y
10. Gordeuk VR, Miasnikova GY, Sergueeva AI, et al. Chuvash polycythemia VHRL200W mutation is associated with down-regulation of hepcidin expression. *Blood*. Nov 10 2011;118(19):5278-82. doi:10.1182/blood-2011-03-345512
11. Yang YP, Muzny DM, Xia F, et al. Molecular Findings Among Patients Referred for Clinical Whole-Exome Sequencing. *Jama-J Am Med Assoc*. Nov 12 2014;312(18):1870-1879. doi:10.1001/jama.2014.14601
12. Miller DT, Lee K, Chung WK, et al. Correction to: ACMG SF v3.0 list for reporting of secondary findings in clinical exome and genome sequencing: a policy statement of the American College of Medical Genetics and Genomics (ACMG). *Genet Med*. Aug 2021;23(8):1582-1584. doi:10.1038/s41436-021-01278-8
13. Olfson E, Cottrell CE, Davidson NO, et al. Identification of Medically Actionable Secondary Findings in the 1000 Genomes. *PLoS One*. 2015;10(9):e0135193. doi:10.1371/journal.pone.0135193
14. Amendola LM, Dorschner MO, Robertson PD, et al. Actionable exomic incidental findings in 6503 participants: challenges of variant classification. *Genome Res*. Mar 2015;25(3):305-15. doi:10.1101/gr.183483.114
15. Schwartz MLB, McCormick CZ, Lazzeri AL, et al. A Model for Genome-First Care: Returning Secondary Genomic Findings to Participants and Their Healthcare Providers in a Large Research Cohort. *Am J Hum Genet*. Sep 6 2018;103(3):328-337. doi:10.1016/j.ajhg.2018.07.009
16. Van Hout CV, Tachmazidou I, Backman JD, et al. Exome sequencing and characterization of 49,960 individuals in the UK Biobank. *Nature*. Oct 2020;586(7831):749-756. doi:10.1038/s41586-020-2853-0
17. Grzymski JJ, Elhanan G, Morales Rosado JA, et al. Population genetic screening efficiently identifies carriers of autosomal dominant diseases. *Nat Med*. Aug 2020;26(8):1235-1239. doi:10.1038/s41591-020-0982-5

18. Park J, Lucas AM, Zhang X, et al. Exome-wide evaluation of rare coding variants using electronic health records identifies new gene-phenotype associations. *Nat Med*. Jan 2021;27(1):66-72. doi:10.1038/s41591-020-1133-8
19. Susswein LR, Marshall ML, Nusbaum R, et al. Pathogenic and likely pathogenic variant prevalence among the first 10,000 patients referred for next-generation cancer panel testing. *Genet Med*. Aug 2016;18(8):823-32. doi:10.1038/gim.2015.166
20. Wu P, Gifford A, Meng X, et al. Mapping ICD-10 and ICD-10-CM Codes to Phecodes: Workflow Development and Initial Evaluation. *JMIR Med Inform*. Nov 29 2019;7(4):e14325. doi:10.2196/14325
21. Denny JC, Bastarache L, Ritchie MD, et al. Systematic comparison of phenome-wide association study of electronic medical record data and genome-wide association study data. *Nat Biotechnol*. Dec 2013;31(12):1102-10. doi:10.1038/nbt.2749
22. Roden DM, Pulley JM, Basford MA, et al. Development of a large-scale de-identified DNA biobank to enable personalized medicine. *Clin Pharmacol Ther*. Sep 2008;84(3):362-9. doi:10.1038/clpt.2008.89
23. Amberger JS, Bocchini CA, Scott AF, Hamosh A. OMIM.org: leveraging knowledge across phenotype-gene relationships. *Nucleic Acids Res*. Jan 8 2019;47(D1):D1038-D1043. doi:10.1093/nar/gky1151
24. Rehm HL, Berg JS, Brooks LD, et al. ClinGen--the Clinical Genome Resource. *N Engl J Med*. Jun 4 2015;372(23):2235-42. doi:10.1056/NEJMSr1406261
25. Strande NT, Riggs ER, Buchanan AH, et al. Evaluating the Clinical Validity of Gene-Disease Associations: An Evidence-Based Framework Developed by the Clinical Genome Resource. *Am J Hum Genet*. Jun 1 2017;100(6):895-906. doi:10.1016/j.ajhg.2017.04.015
26. Hastie CE, Mackay DF, Ho F, et al. Vitamin D concentrations and COVID-19 infection in UK Biobank. *Diabetes Metab Syndr*. Jul - Aug 2020;14(4):561-565. doi:10.1016/j.dsx.2020.04.050
27. Thaxton C, Good ME, DiStefano MT, et al. Utilizing ClinGen gene-disease validity and dosage sensitivity curations to inform variant classification. *Hum Mutat*. Oct 25 2021;doi:10.1002/humu.24291
28. Stolarova L, Kleiblova P, Janatova M, et al. CHEK2 Germline Variants in Cancer Predisposition: Stalemate Rather than Checkmate. *Cells-Basel*. Dec 2020;9(12)doi:ARTN 2675 10.3390/cells9122675
29. Dominguez-Valentin M, Sampson JR, Seppala TT, et al. Cancer risks by gene, age, and gender in 6350 carriers of pathogenic mismatch repair variants: findings from the Prospective Lynch Syndrome Database. *Genet Med*. Jan 2020;22(1):15-25. doi:10.1038/s41436-019-0596-9
